# Supplementary material for: A data-consistent model of the last glaciation in the Alps achieved with physics-driven AI
Source: Research Square preprint supplement (doi:10.21203/rs.3.rs-5043392/v1), 2024-09-11
Supplement: Supplementary file 1 [file 2ab8ad64f9cc3f5978cfcae4.pdf]

# A data-consistent model of the last glaciation in the Alps achieved with physics-driven AI

Tancrède P.M. Leger<sup>1,2\*</sup>, Guillaume Jouvét<sup>1+</sup>, Sarah Kamleitner<sup>1,3</sup>, Jürgen Mey<sup>4</sup>, Frederic Herman<sup>1</sup>, Brandon D. Finley<sup>1</sup>, Susan Ivy-Ochs<sup>5</sup>, Andreas Vieli<sup>3</sup>, Andreas Henz<sup>3</sup>, Samuel U. Nussbaumer<sup>3</sup>

<sup>1</sup>*Institute of Earth Surface Dynamics, University of Lausanne, Lausanne, Switzerland*

<sup>2</sup>*Department of Geography, University of Sheffield, Sheffield, United Kingdom*

<sup>3</sup>*Department of Geography, University of Zurich, Zurich, Switzerland*

<sup>4</sup>*Institute of Earth and environmental systems, University of Potsdam, Potsdam, Germany*

<sup>5</sup>*Laboratory of Ion Beam Physics, ETH Zürich, Zürich, Switzerland*

+ Co first author

\* Correspondence and requests for materials should be addressed to T.P.M.L. (email: [tancrede.leger@unil.ch](mailto:tancrede.leger@unil.ch))

## Supplementary information

**Supplementary Table 1: The 10 ensemble-varying parameters and their range values**

**Supplementary Table 1. Ensemble-varying parameter ranges**

| Varying model parameter                                            | System component             | Range<br>[min - max]                 | Unit                                     |
|--------------------------------------------------------------------|------------------------------|--------------------------------------|------------------------------------------|
| Pseudo-plastic sliding law U threshold                             | Sliding                      | [100 - 2000]                         | n/a                                      |
| Topographic control on yield Stress: lower bed elevation threshold | Bed softness                 | [-500 - 100]                         | m a.s.l.                                 |
| Topographic control on yield Stress: upper bed elevation threshold | Bed softness                 | [2400 - 3000]                        | m a.s.l.                                 |
| Flow law enhancement factor                                        | Ice properties               | [0.5 - 2]                            | n/a                                      |
| Positive Degree Day melt factor for ice                            | Surface Mass Balance         | [6 - 9]                              | mm we .d <sup>-1</sup> .°C <sup>-1</sup> |
| Positive Degree Day refreezing factor                              | Surface Mass Balance         | [0.5 - 0.7]                          | scalar multiplier                        |
| Surface air-to-ice temperature offset                              | Ice enthalpy                 | [1 - 3]                              | °C                                       |
| Basal topography (with or without valley-fill sediments)           | Topography                   | [without sediments - with sediments] | n/a                                      |
| Catchment-specific precipitation offsets                           | Climate                      | [0.85 - 1.15]                        | scalar multiplier of offset map          |
| Lithospheric elastic thickness                                     | Glacial Isostatic Adjustment | [35000 - 50000]                      | m                                        |

# IGM: now a 3D thermo-mechanical glacier model

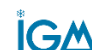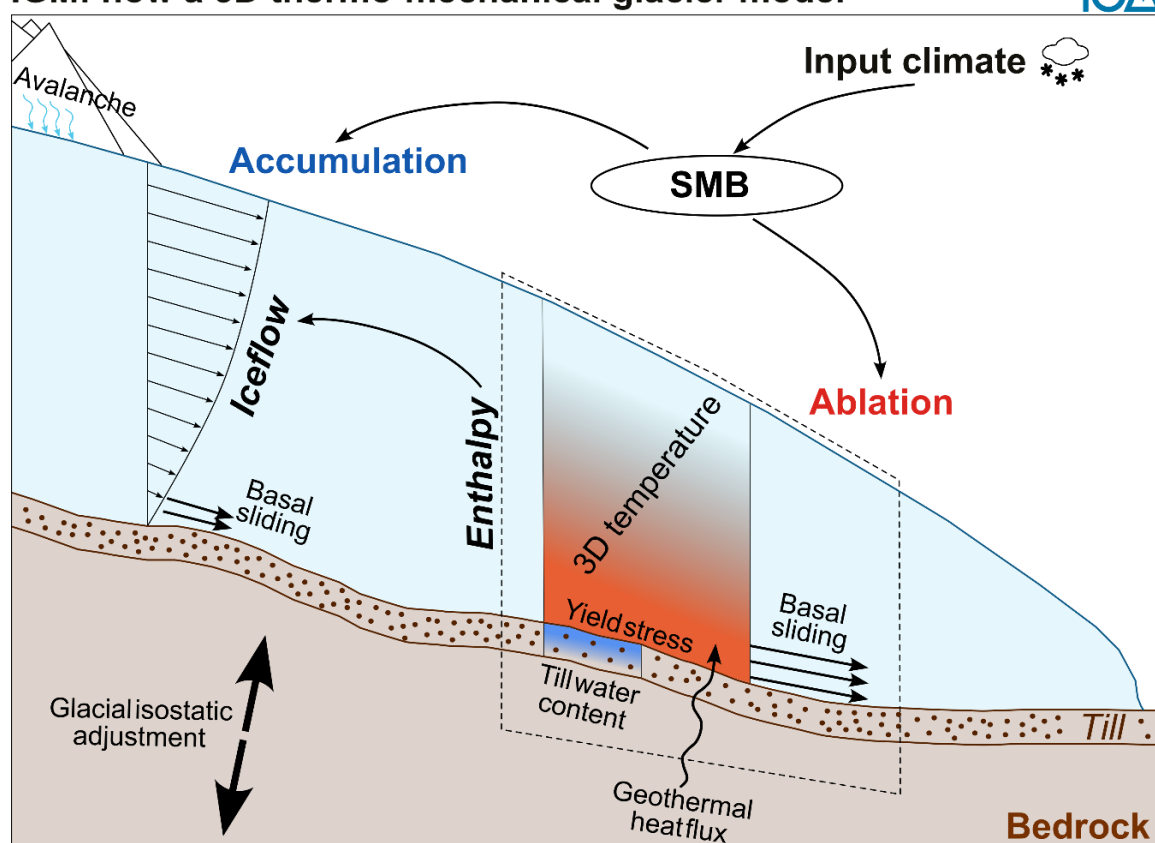

**Supplementary Figure 1:** Diagram showing all components of the glacier system here modelled with IGM at 300 m resolution and over the entire European Alps. “SMB” stands for “surface mass balance”.

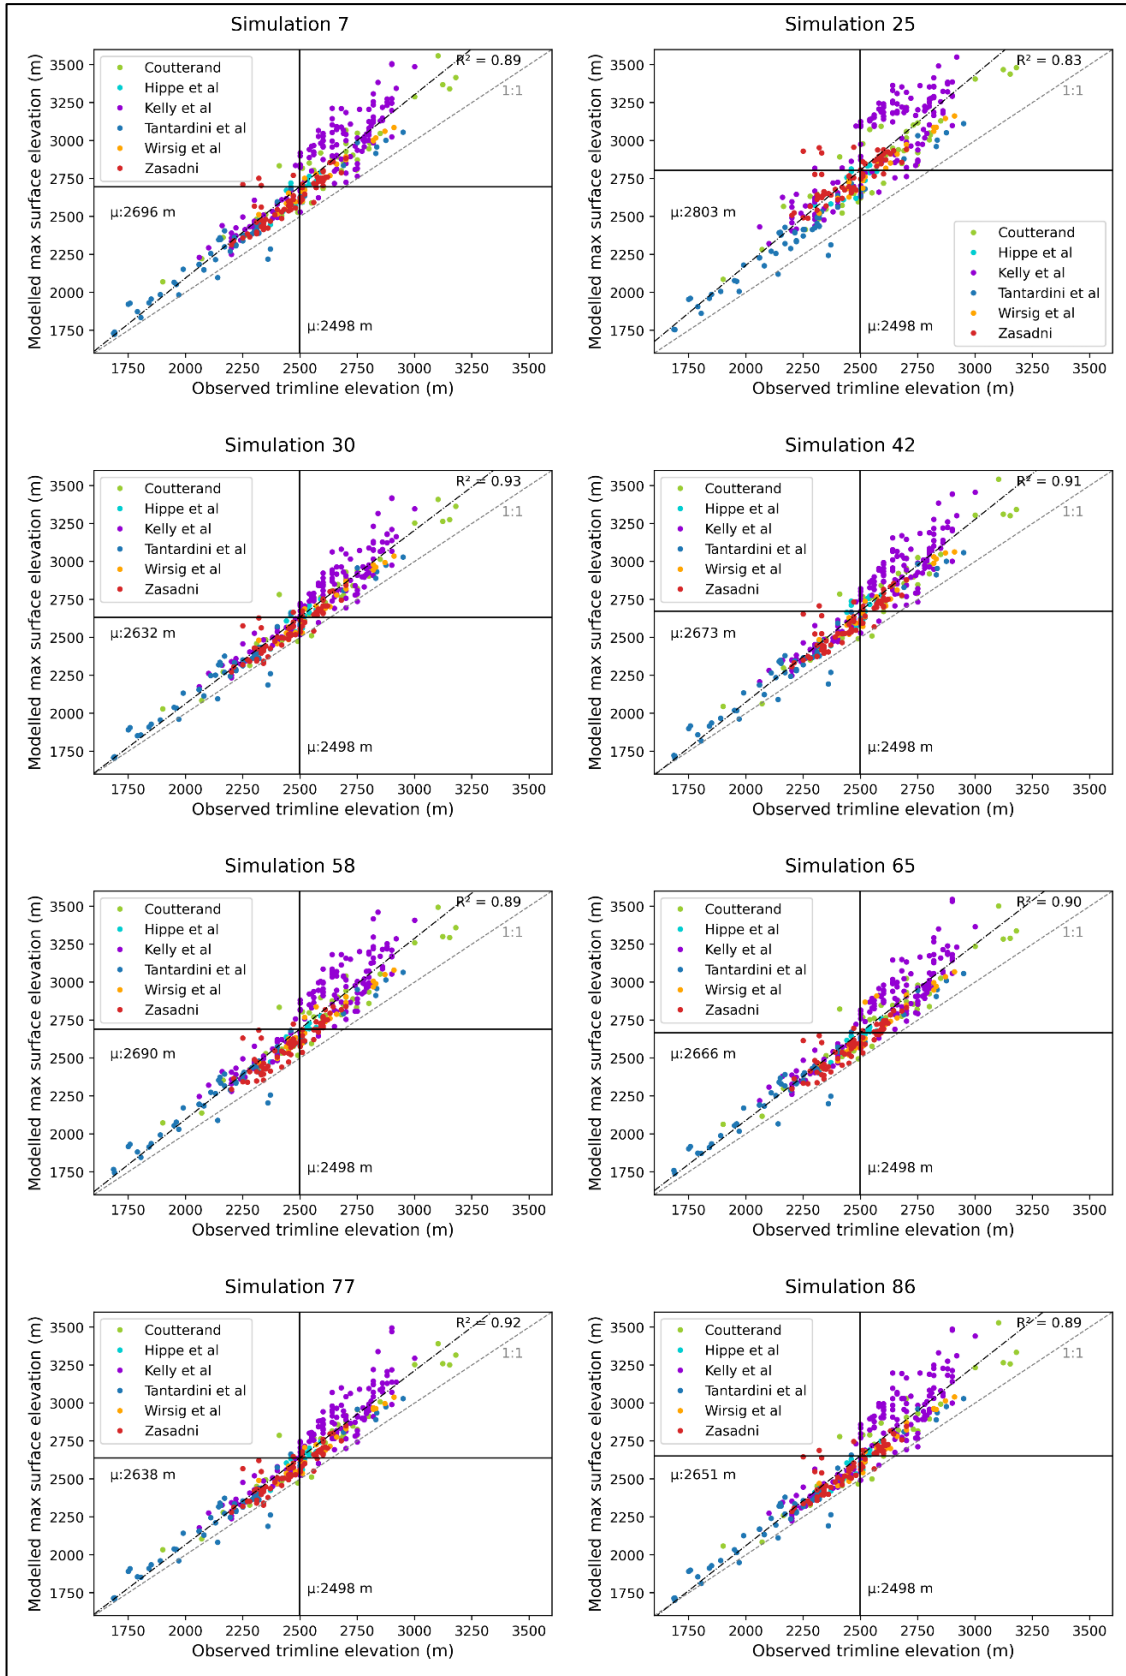

**Supplementary Figure 2:** Observed trimline elevations ( $n=353$ ) vs time-independent maximum modelled ice surface elevations for eight randomly picked ensemble simulations (non-NROYs). Despite not targeting best-fit simulations, and the highly variable input parameter configurations between these simulations, linear regression analyses still yield a strong correlation ( $r^2 > 0.75$ ) in all cases.

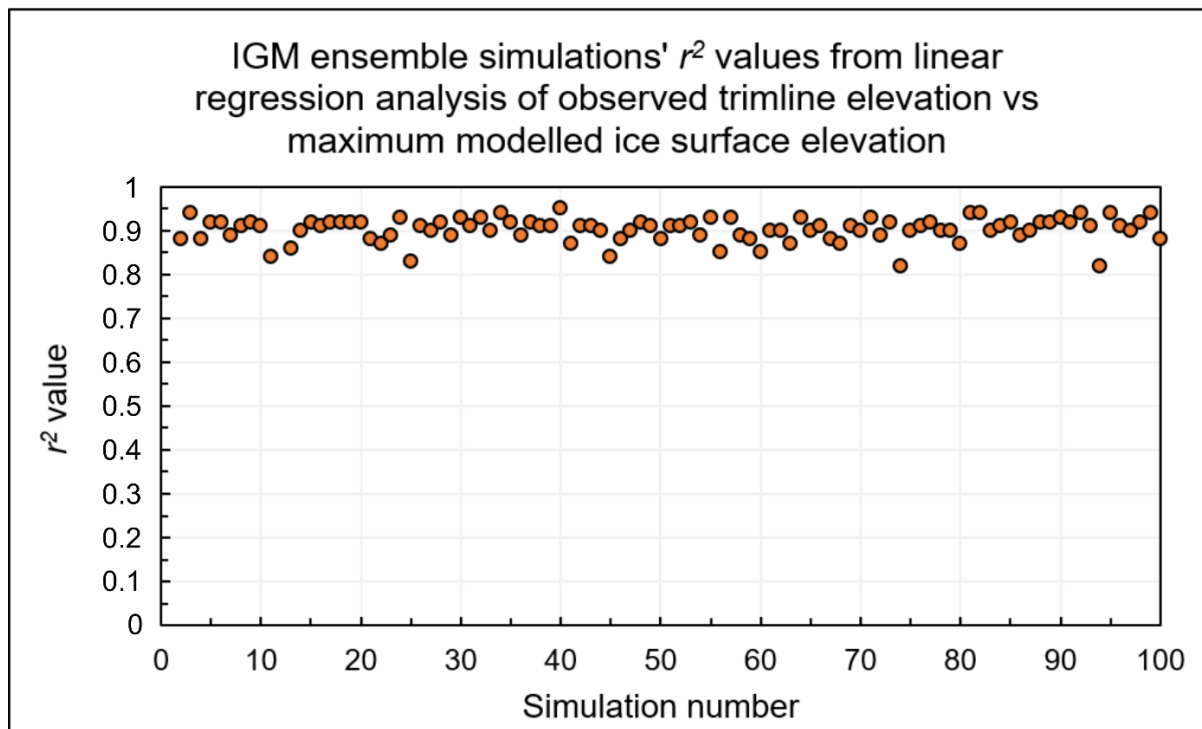

**Supplementary Figure 3:**  $R^2$  values from linear regression analyses of all ( $n=353$ ) observed trimline elevations compiled here versus maximum LGM modelled ice surface elevations, for all 100 ensemble simulations of the AIF ran at 300 m spatial resolution with IGM. For all simulations, and despite highly variable parameter configurations and LGM modelled AIF geometries, the linear relationship between observed and modelled elevations at the location of trimlines remains greater than 0.8, suggesting a strong correlation persists.



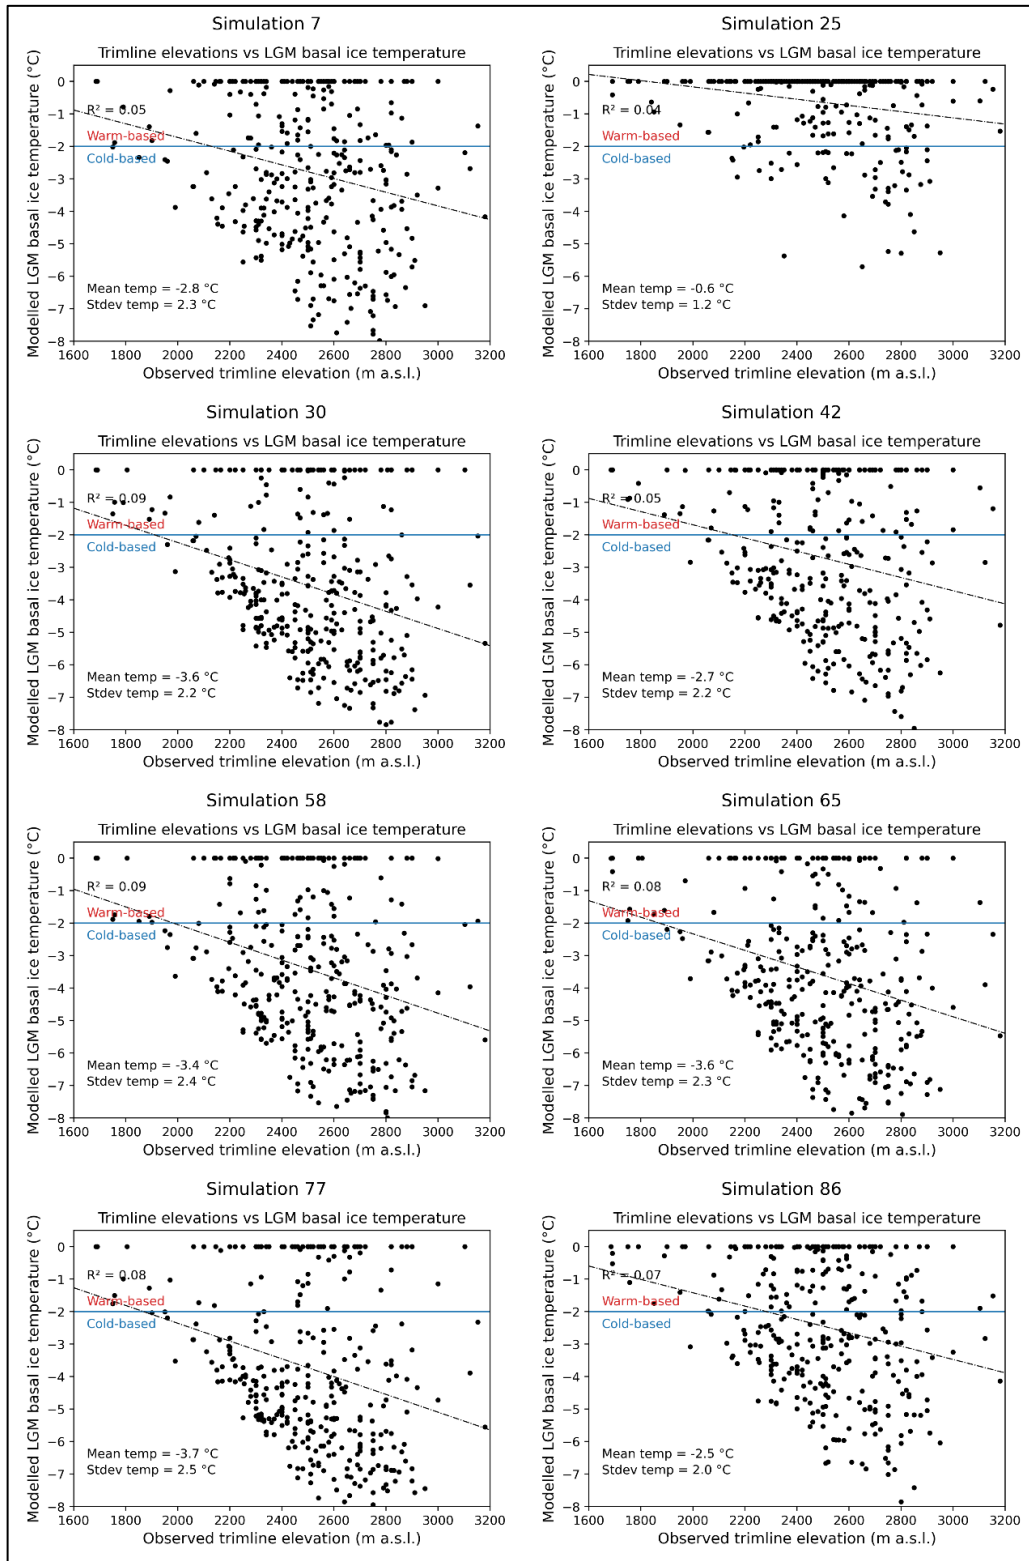

**Supplementary Figure 4:** Observed trimline elevations ( $n=353$ ) versus maximum pressure-adjusted basal ice temperature during the LGM (26-23 ka) for eight randomly picked ensemble simulations (non-NROs). The lack of clustering along the Y axis indicates highly variable modelled basal ice temperatures at the location of trimlines. In these graphs, a correlation between basal ice temperatures transitioning from warm to cold based and the formation of observed trimlines would produce a horizontal cluster towards a temperature value of  $-2\text{ }^{\circ}\text{C}$  (blue line). This does not seem to be the case. Note that each point yields some uncertainty associated with comparing point data (observed trimlines) to a temperature value covering a  $0.09\text{ km}^2$  model grid cell at that location, which, over steep terrain, can introduce a certain elevation bias.

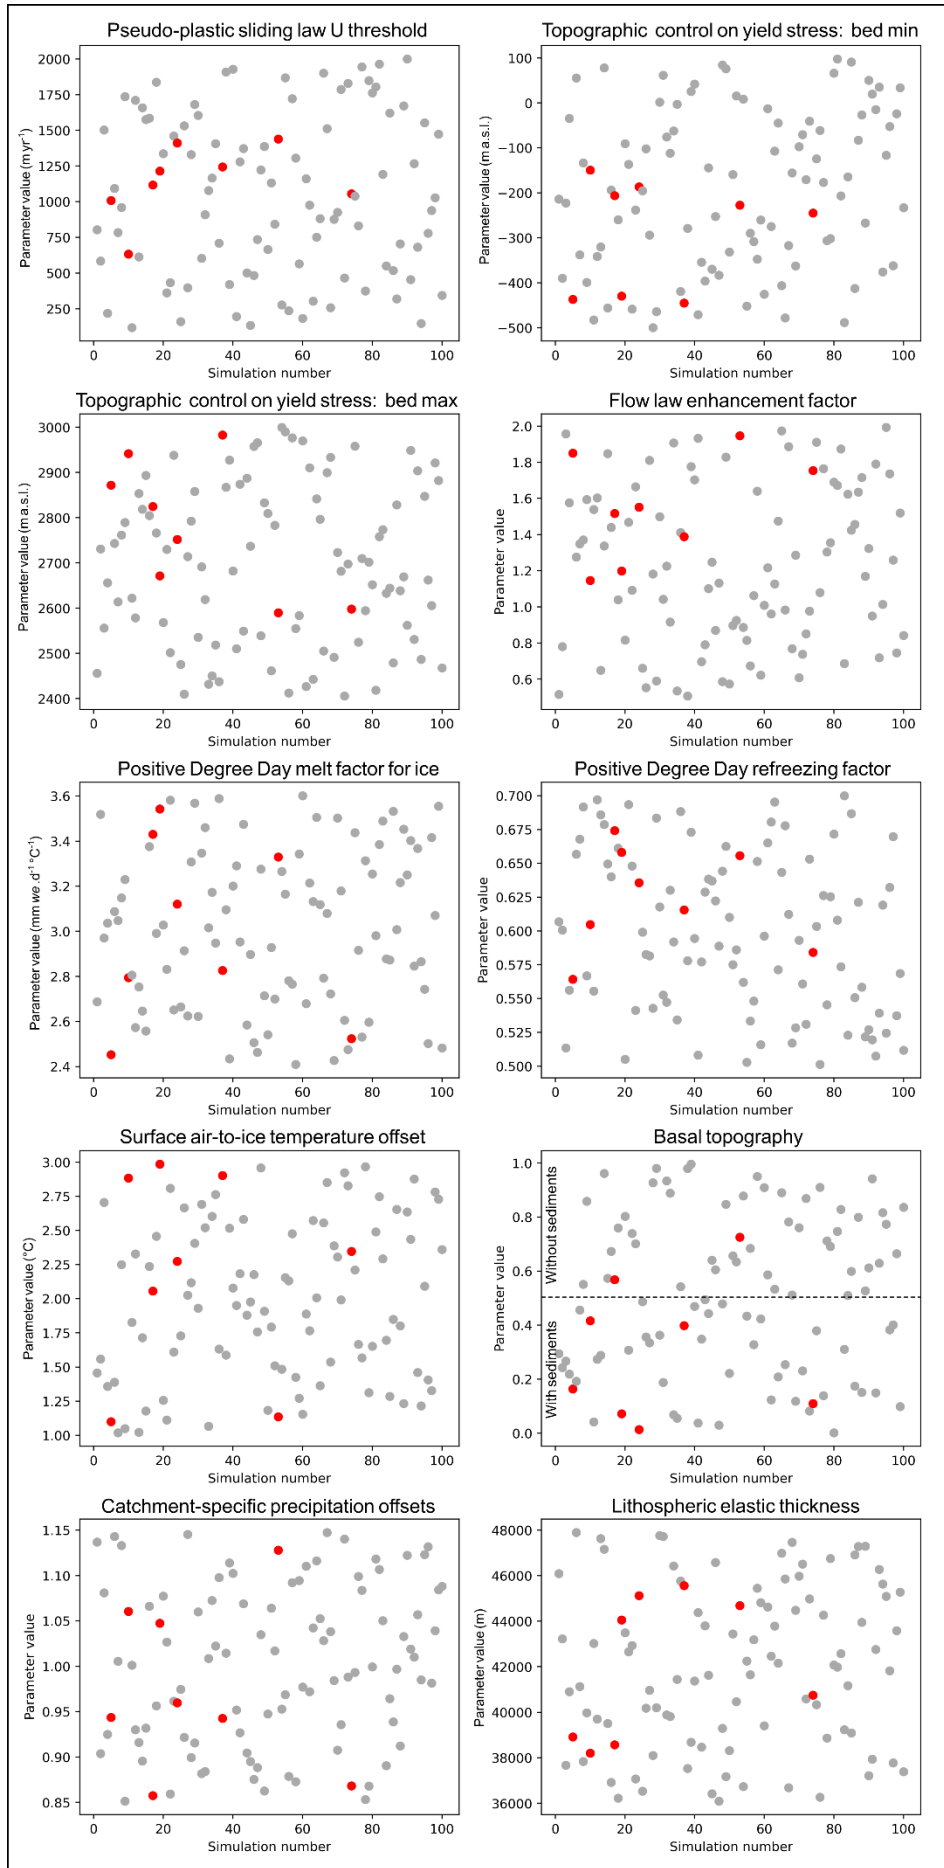

**Supplementary Figure 5:** Ensemble-varying parameter values for the NROY (red,  $n=8$ ) and all remaining (grey,  $n=92$ ) ensemble simulations, sampled using a Latin Hypercube algorithm. The wide ranges in NROY parameter values (red) along the Y axes indicate a lack of clusters. This suggests better model-data fit (relative to other ensemble simulations) can be obtained with highly variable individual parameter values, making the variety of suitable parameter configurations difficult to predict without a comprehensive exploration of the parameter space. These results indicate the relationship between model-data fit and parameter values may feature numerous local minima. This justifies the use of a perturbed parameter ensemble approach for exploring the numerous possible model responses to parameter variations.

## IGM 300 m ensemble best-fit simulation (37) with vs without valley-fill sediments comparison

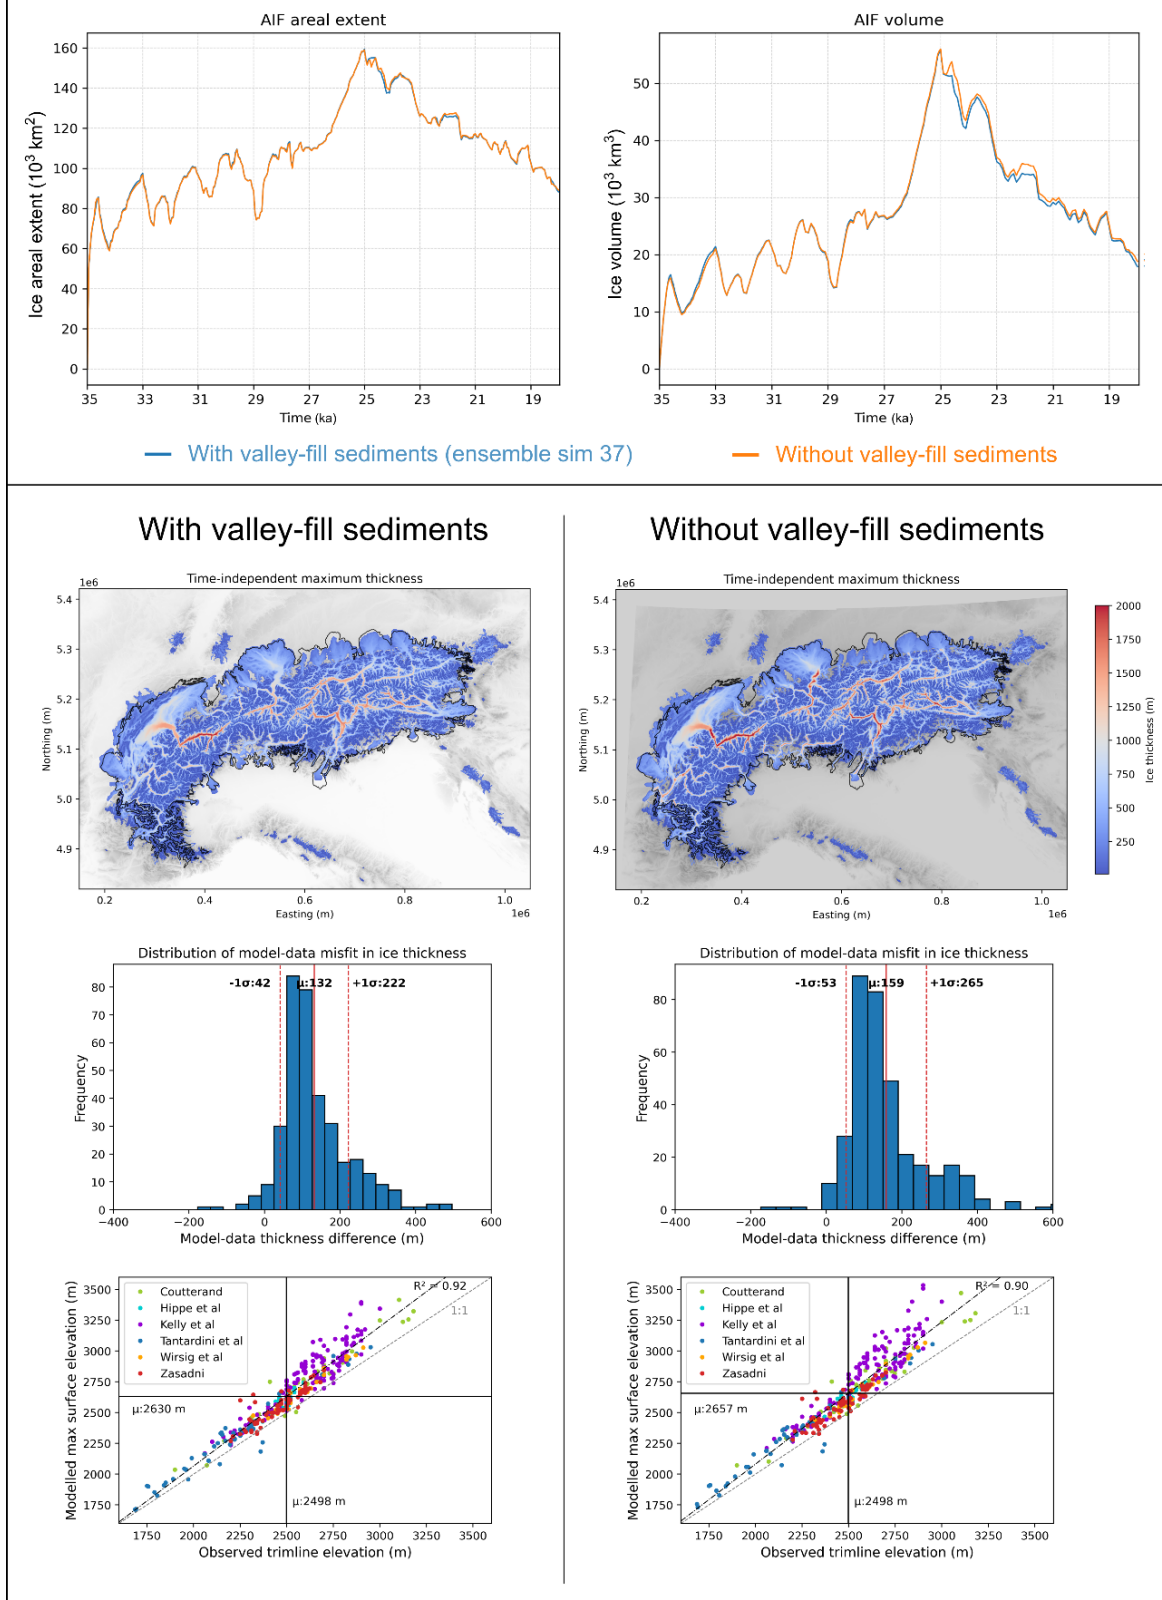

**Supplementary Figure 6:** Sensitivity of ensemble best-fit simulation (37) to removal of valley-fill sediments tested by running IGM with the original DEM (with sediments) and with the topography from Mey *et al.* (2016) without valley-fill sediments. This test shows that the impact of removing valley-fill sediment on the modelled LGM geometry of the AIF is minimal.

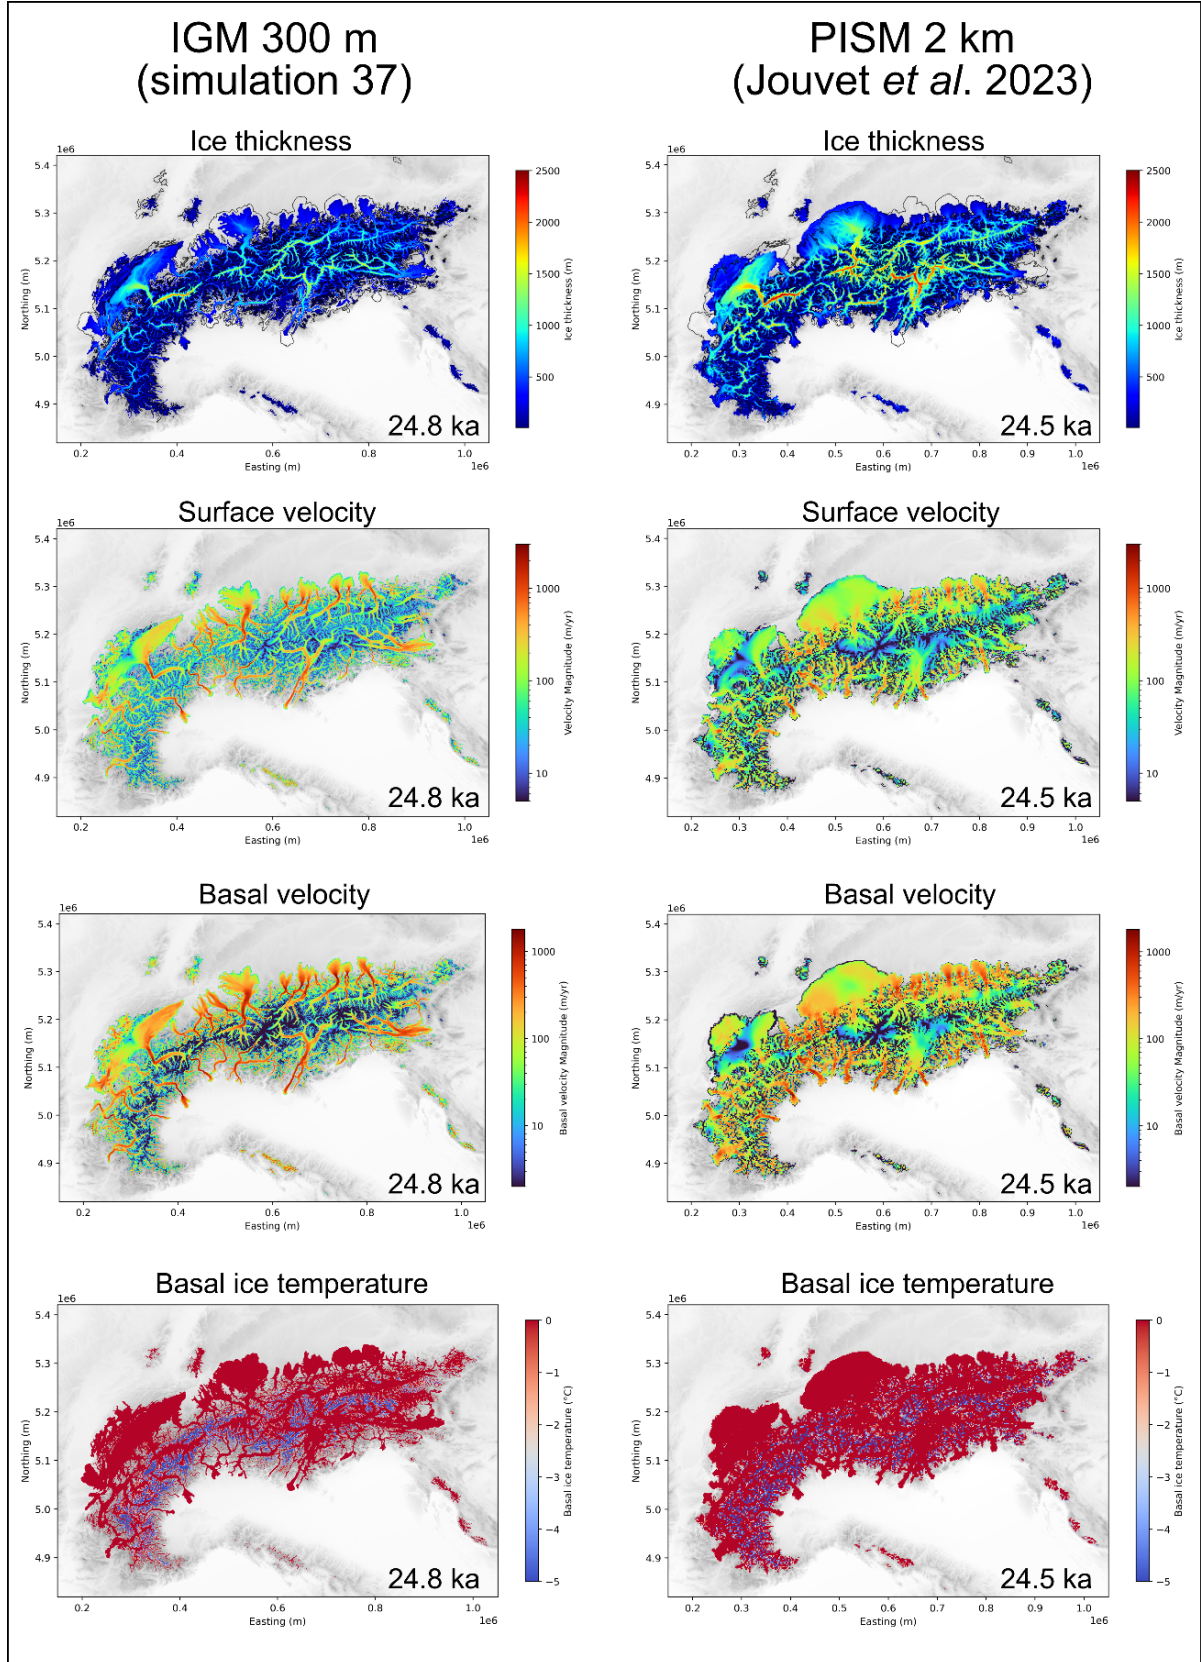

**Supplementary Figure 7:** Qualitative comparisons of spatially dependent output variables towards the LGM (24.8 ka) from ensemble simulation 37, *i.e.* our best-fitting IGM 300 m resolution simulation, and Jouvét *et al.* (2023)' PISM 2 km simulation.



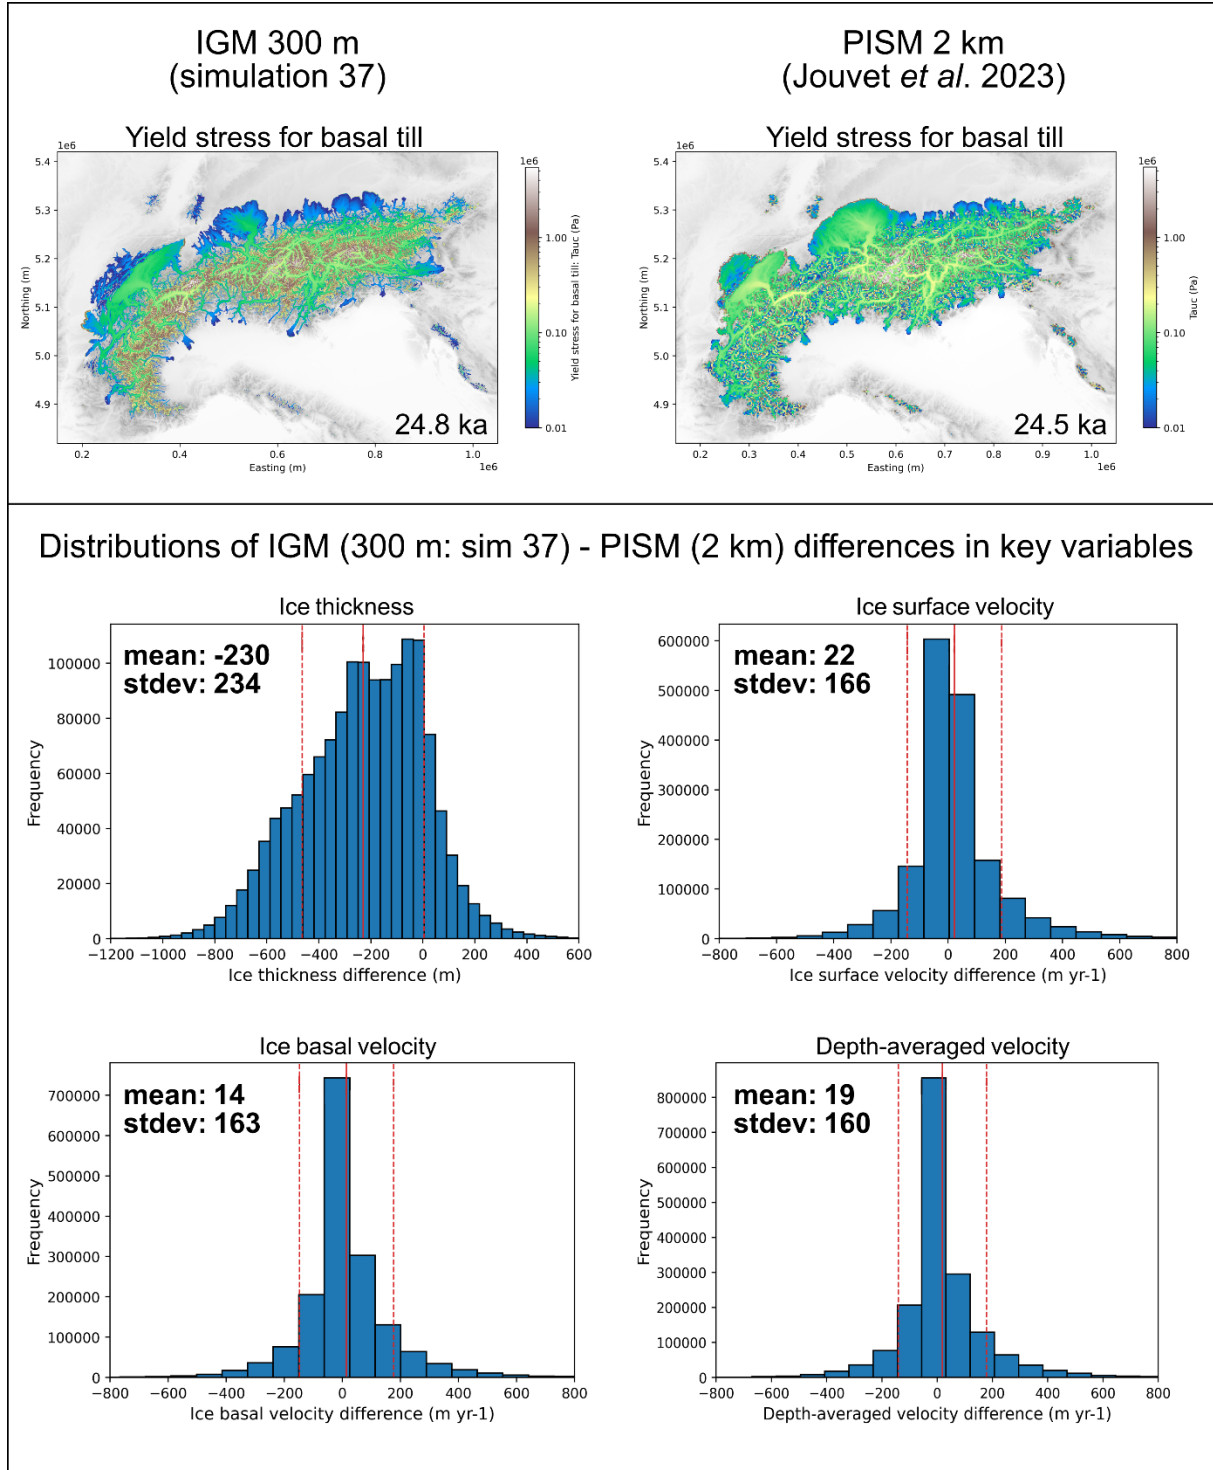

**Supplementary Figure 8:** Qualitative and quantitative comparisons of spatially-dependent output variables towards the LGM (24.8 ka) from ensemble simulation 37, *i.e.* our best-fitting IGM 300 m simulation, and Jouvet *et al.* (2023)' PISM 2 km simulation.

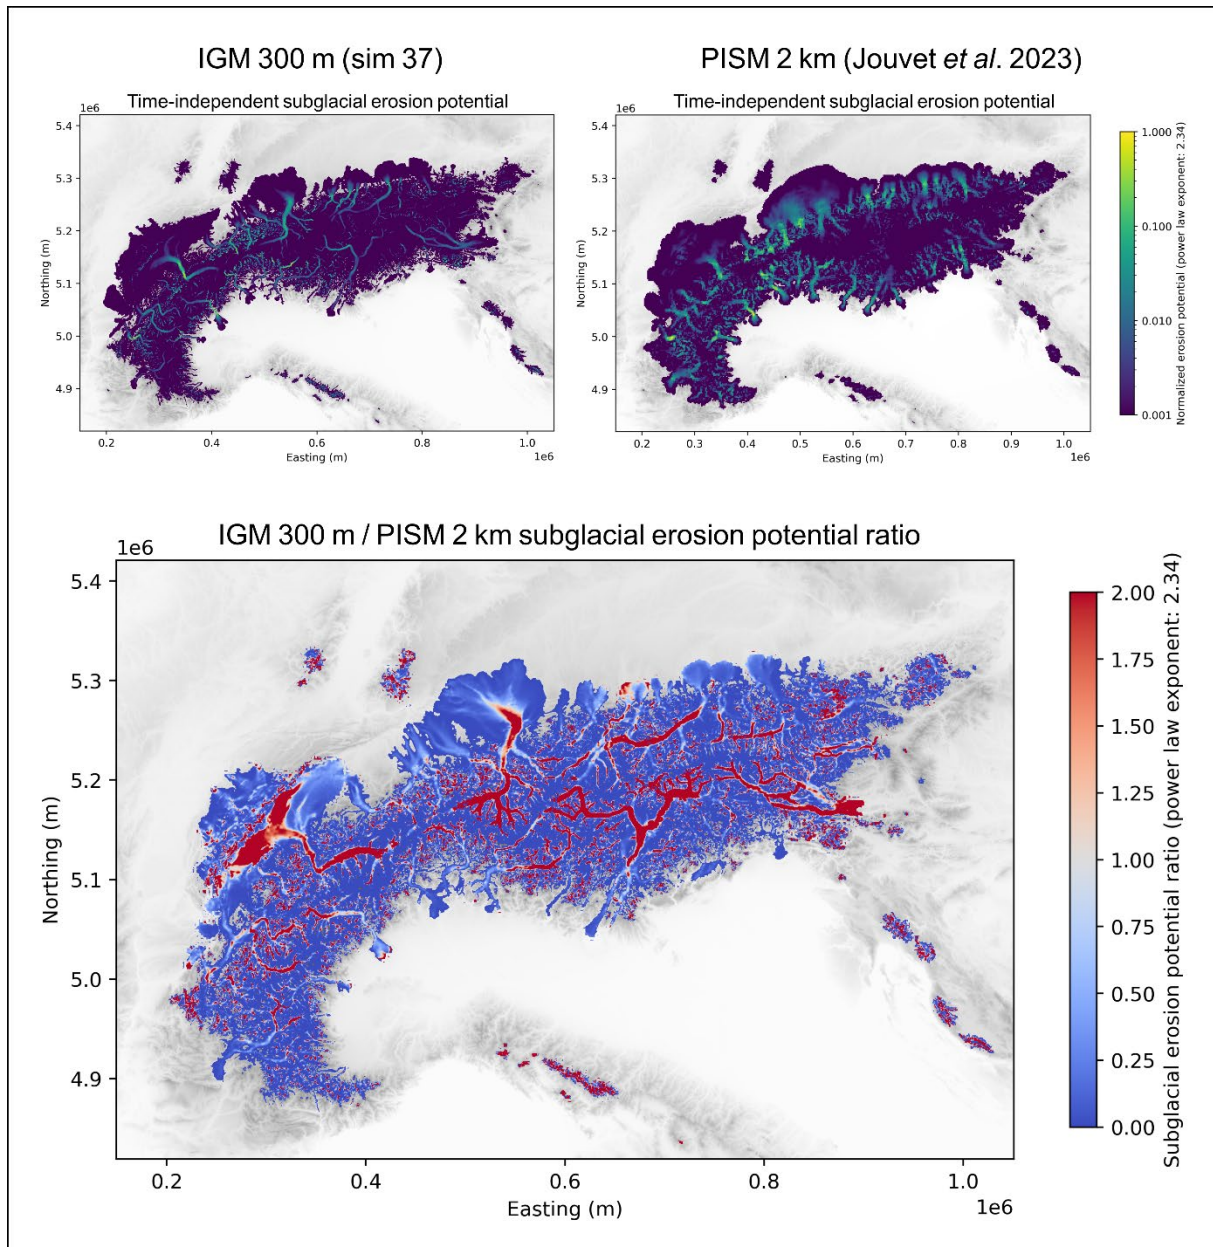

**Supplementary Figure 9:** Time-integrated subglacial erosion potential for IGM 300 m best-fitting simulation 37 (upper left panel), for the PISM 2 km simulation of Jouvet *et al.* (2023) (upper right panel), and the ratio between these two (lower panel). The subglacial erosion potential is here computed (for both models) using a simple power law and a velocity exponent of 2.34, after Koppes *et al.* (2015) and Seguinot *et al.* (2021). Red colours indicate more subglacial erosion potential with IGM 300 m than with PISM at 2 km, blue colours indicate the opposite. At higher resolution, modelled basal ice velocities become significantly faster mostly in main valley troughs.

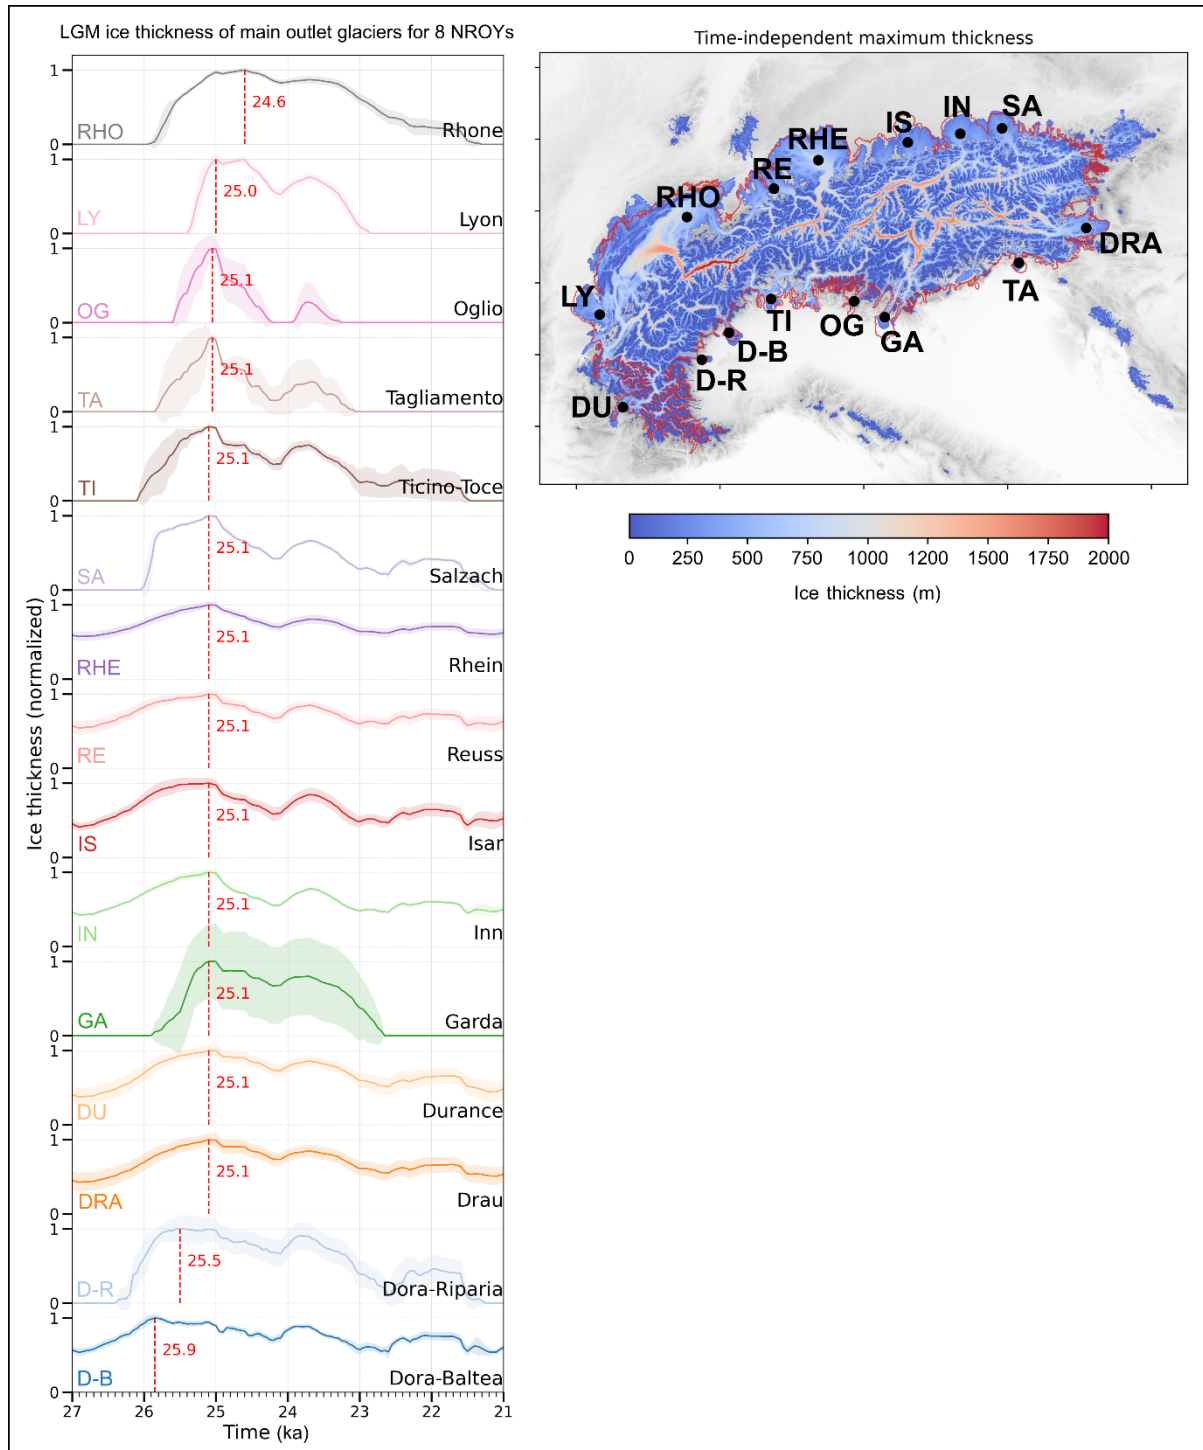

**Supplementary Figure 10:** Normalized ice thickness time series over the full LGM period at the location of black dots highlighted in right-hand map. The location of dots is chosen such that extracted ice thickness time series act as a proxy for the ice extent evolution of the 15 largest AIF outlet glaciers during the LGM. Thick lines and transparent bands indicate the NROY mean ( $n=8$ ) and standard deviation of the ice thickness data, respectively. Dashed red lines indicate the timing of maximum outlet glacier thickness and thus extent, in ka. These time series suggest centennial-scale asynchronies in the timing of LGM outlet glacier extent. For instance, the Lyon and Rhone glacier tongues reach (or remain close to) their maximum extents until five centuries after most other glaciers start to retreat. On the other hand, the Dora-Baltea and Dora-Riparia glaciers reach maximum extents eight and four centuries before other sampled glaciers.



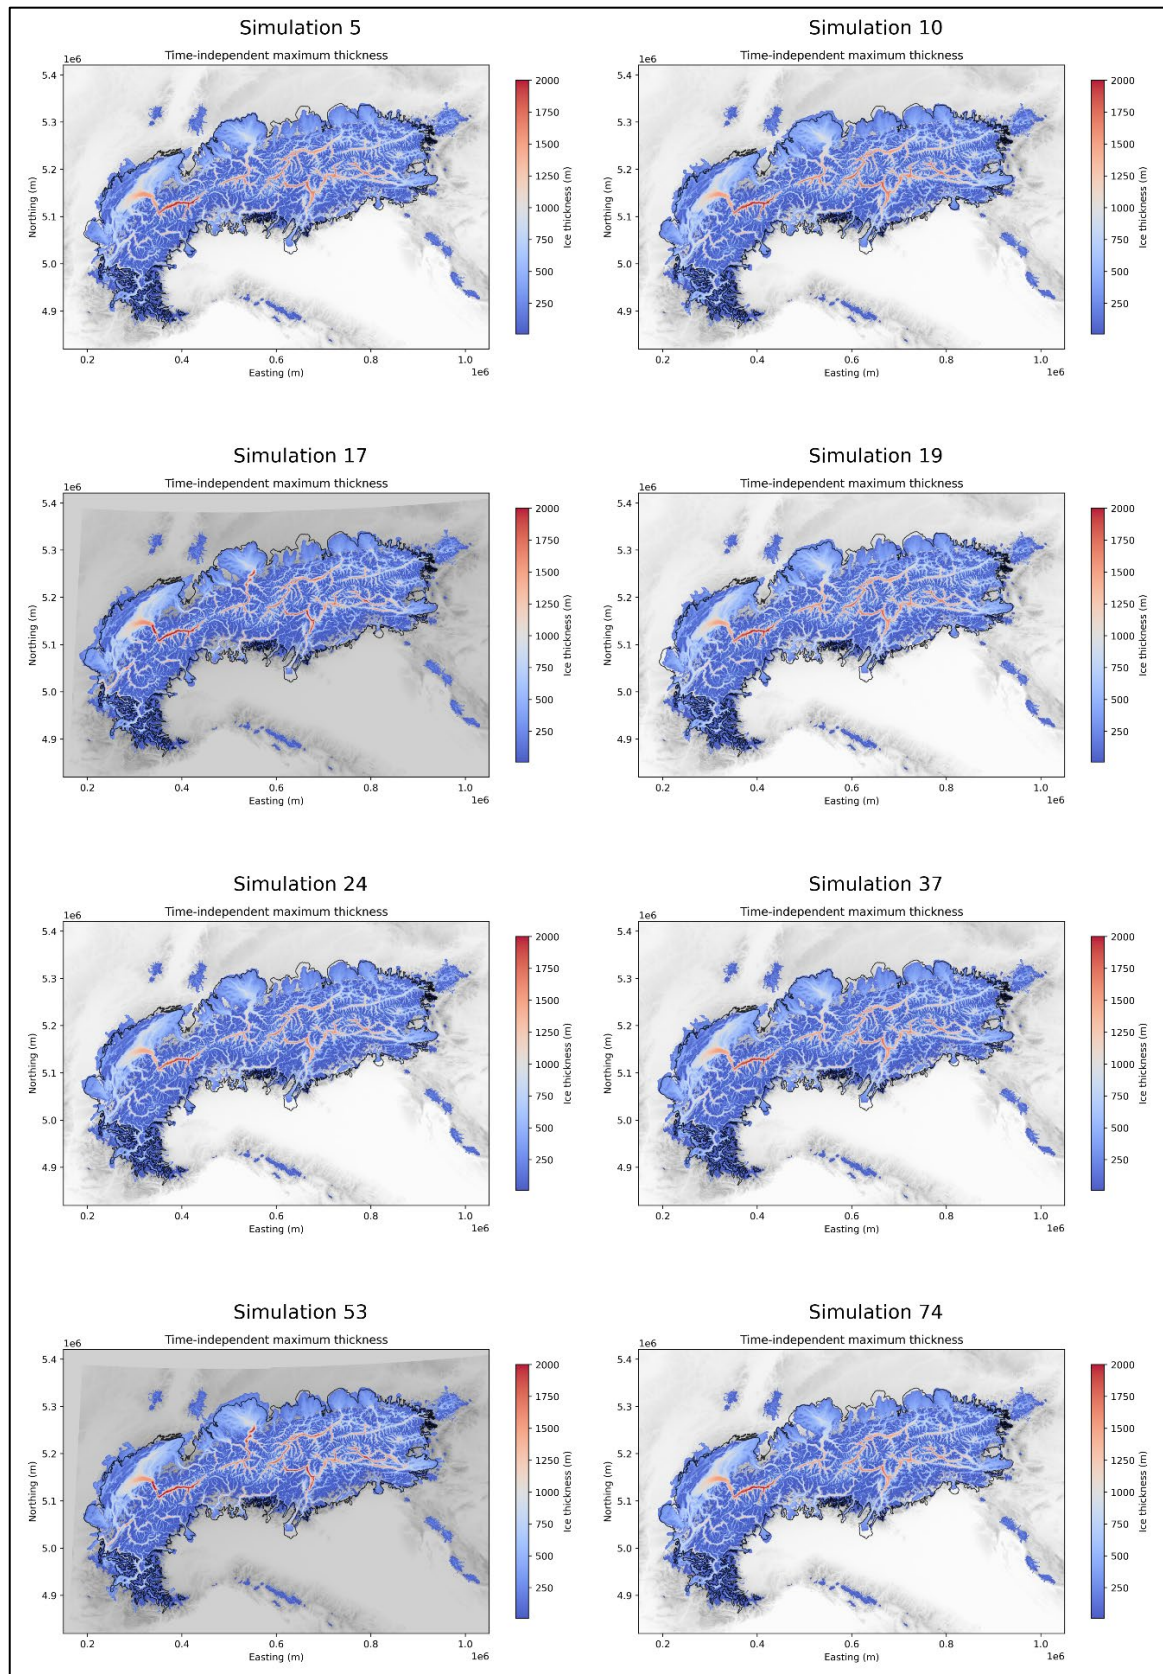

**Supplementary Figure 11:** Time-independent maximum ice thickness for the eight NROY ensemble-member simulations that remain after applying three model-data comparison sieves.

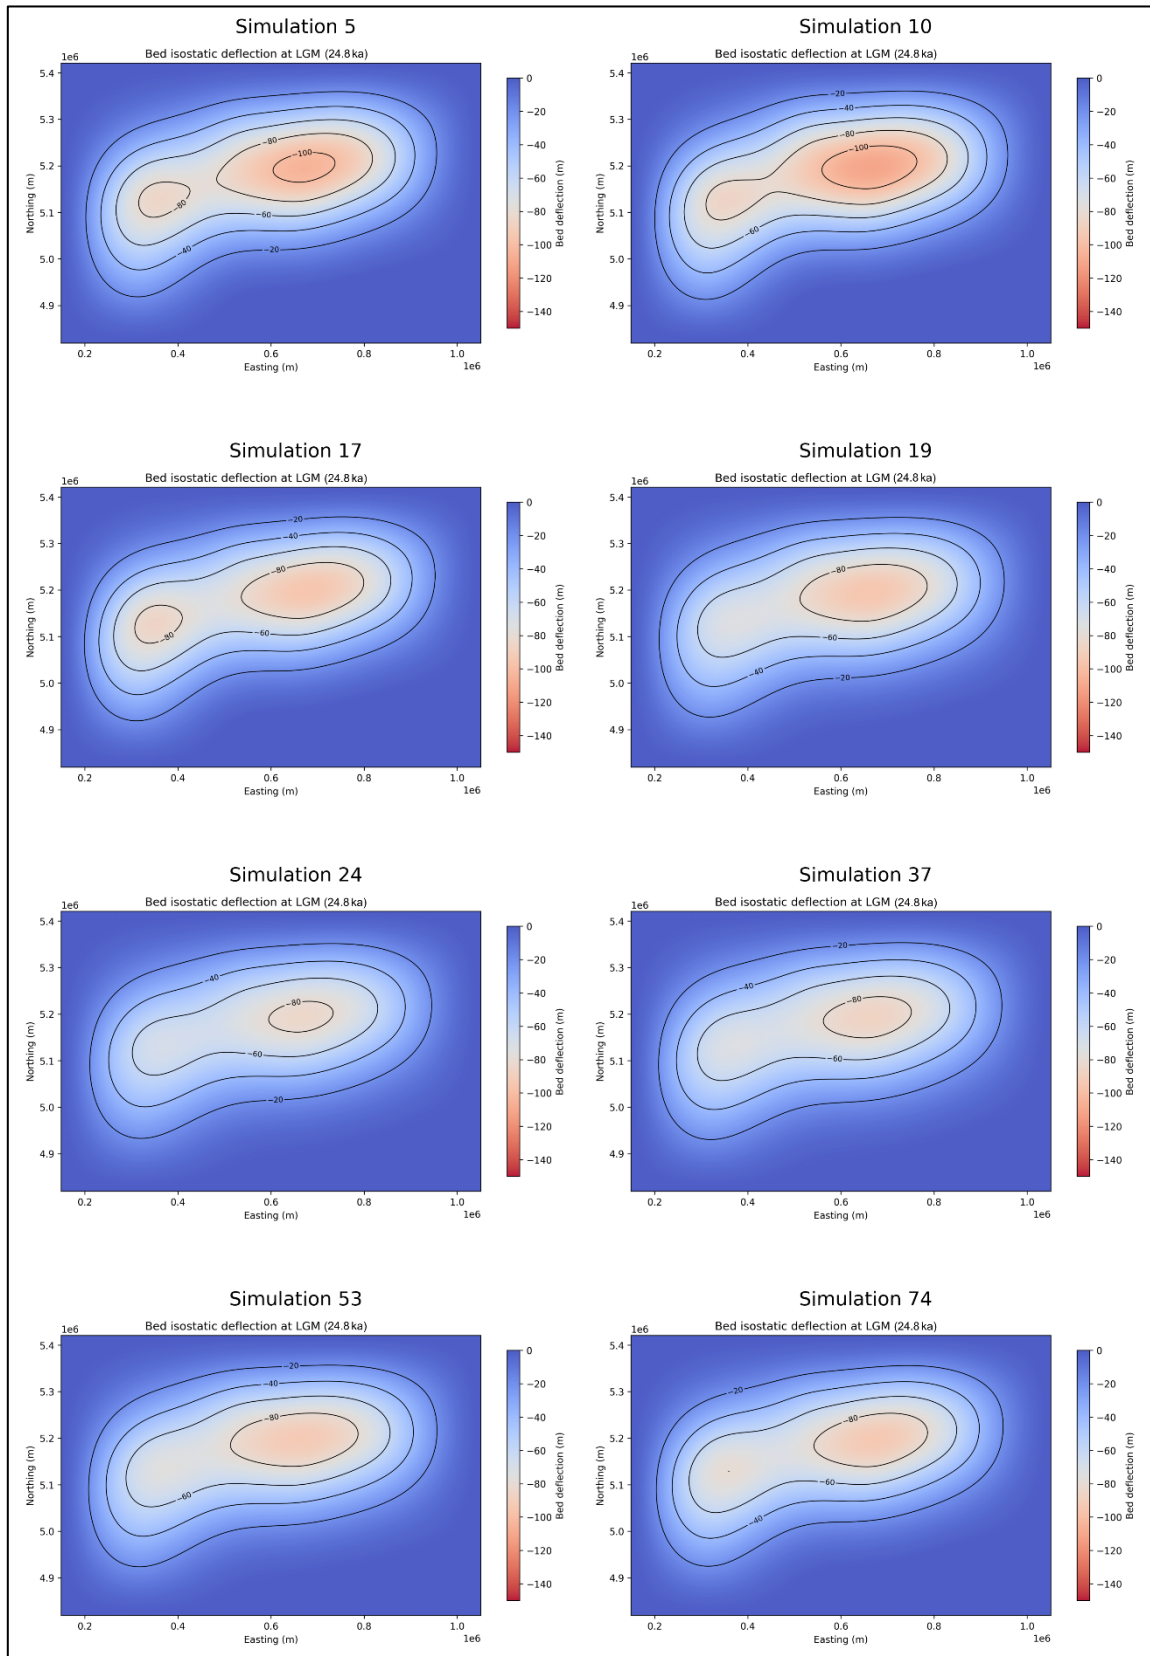

**Supplementary Figure 12:** Glacial Isostatic Adjustment-induced crustal deflection at the LGM for the eight NROY ensemble-member simulations that remain after applying three model-data comparison sieves. During the LGM, we find our NROYS produce a maximum crustal deflection near the AIF centre of  $93.1 \pm 13.5$  m (NROY mean  $\pm$  stdev).

## Supplementary Table 2: Values and descriptions for all non-ensemble-varying IGM parameters

Supplementary Table 2. non-varying IGM parameter values

| IGM parameter name               | Description                                                           | System component             | Value (fixed for all ensemble simulations) | Unit                                 |
|----------------------------------|-----------------------------------------------------------------------|------------------------------|--------------------------------------------|--------------------------------------|
| clim_update_freq                 | Frequency at which the climate is updated using glacial index         | Input climate                | 100.0                                      | yr                                   |
| smb_acpdd_update_freq            | Update the Surface Mass Balance (SMB) each x years                    | Surface mass balance         | 1.0                                        | yr                                   |
| smb_acpdd_thr_temp_snow          | Threshold temperature for solid precipitation                         | Surface mass balance         | 0.0                                        | °C                                   |
| smb_acpdd_thr_temp_rain          | Threshold temperature for liquid precipitation                        | Surface mass balance         | 2.0                                        | °C                                   |
| smb_acpdd_melt_factor_snow       | Positive Degree Day melt rate for snow                                | Surface mass balance         | 1.20409532638                              | m °C <sup>-1</sup> yr <sup>-1</sup>  |
| smb_acpdd_shift_hydro_year       | This serves to start Oct 1. the acc/melt computation                  | Surface mass balance         | 0.75                                       | yr                                   |
| smb_acpdd_ice_density            | Density of ice for conversion of SMB into ice equivalent              | Surface mass balance         | 910.0                                      | kg m <sup>-3</sup>                   |
| smb_acpdd_wat_density            | Density of water                                                      | Surface mass balance         | 1000.0                                     | kg m <sup>-3</sup>                   |
| iflo_regu_weertman               | Regularization parameter for Weertman's sliding law                   | Basal sliding                | 10 <sup>-10</sup>                          | n/a                                  |
| iflo_exp_glen                    | Glen's flow law exponent                                              | Ice flow                     | 3.0                                        | n/a                                  |
| iflo_exp_weertman                | Weertman's law exponent                                               | Basal sliding                | 4.0                                        | n/a                                  |
| iflo_gravity_cst                 | Acceleration due to gravity of a free falling object                  | Ice flow                     | 9.81                                       | m s <sup>-2</sup>                    |
| iflo_ice_density                 | Density of ice                                                        | Ice flow                     | 910.0                                      | kg m <sup>-3</sup>                   |
| iflo_Nz                          | Number of grid points for the vertical discretization                 | Ice flow                     | 10.0                                       | n/a                                  |
| iflo_vert_spacing                | Discretization density to get more points towards bed than surface    | Ice flow                     | 4.0                                        | n/a                                  |
| iflo_thr_ice_thk                 | Threshold ice thickness for computing strain rate                     | Ice flow                     | 0.1                                        | m                                    |
| iflo_dim_arrhenius               | Dimension of the arrhenius factor (horizontal 2D or 3D)               | Ice flow                     | 3.0                                        | n/a                                  |
| iflo_retrain_emulator_freq       | Frequency at which the emulator is retrained, 0 means never           | Neural network               | 7.0                                        | time steps                           |
| iflo_retrain_emulator_lr         | Learning rate for the retraining of the emulator                      | Neural network               | 10 <sup>-5</sup>                           | n/a                                  |
| iflo_retrain_emulator_nbit       | Number of iterations at each time step for retraining the emulator    | Neural network               | 1.0                                        | iterations                           |
| iflo_force_max_velbar            | Artificially upper-bound of ice velocities                            | Ice flow                     | 3000.0                                     | m yr <sup>-1</sup>                   |
| iflo_network                     | The type of network, it can be cnn or unet                            | Neural network               | "cnn"                                      | n/a                                  |
| iflo_nb_layers                   | Number of layers in the Convolutional Neural Network (CNN)            | Neural network               | 16.0                                       | n/a                                  |
| iflo_nb_out_filter               | Number of output filters in the CNN                                   | Neural network               | 32.0                                       | n/a                                  |
| iflo_conv_ker_size               | Size of the convolution kernel                                        | Neural network               | 3.0                                        | n/a                                  |
| iflo_min_sr                      | Minimum strain rate                                                   | Ice flow                     | 10 <sup>-5</sup>                           | yr <sup>-1</sup>                     |
| iflo_max_sr                      | Maximum strain rate                                                   | Ice flow                     | 1.0                                        | yr <sup>-1</sup>                     |
| time_start                       | Simulation start                                                      | Time                         | -35000.0                                   | yr BP                                |
| time_end                         | Simulation end                                                        | Time                         | -18000.0                                   | yr BP                                |
| time_save                        | Save output variable frequency                                        | Time                         | 50.0                                       | yr                                   |
| time_cfl                         | CFL number for the stability of the mass conservation scheme          | Time                         | 0.3                                        | .....                                |
| time_step_max                    | Maximum time step allowed, used only with slow ice                    | Time                         | 10.0                                       | yr                                   |
| thk_slope_type                   | Slope limiter for the ice thickness equation (godunov or superbee)    | Ice flow                     | "superbee"                                 | n/a                                  |
| vflo_method                      | Method to retrieve vertical velocities (kinematic, incompressibility) | Ice flow                     | "incompressibility"                        | n/a                                  |
| enth_water_density               | Density of water                                                      | Enthalpy                     | 1000.0                                     | kg m <sup>-3</sup>                   |
| enth_spy                         | Number of seconds in a year                                           | Enthalpy                     | 31556926.0                                 | seconds yr <sup>-1</sup>             |
| enth_ki                          | Conductivity of cold ice                                              | Enthalpy                     | 2.1                                        | W m <sup>-1</sup> K <sup>-1</sup>    |
| enth_ci                          | Specific heat capacity of ice                                         | Enthalpy                     | 2009.0                                     | W s kg <sup>-1</sup> K <sup>-1</sup> |
| enth_Lh                          | Latent heat of fusion                                                 | Enthalpy                     | 334000.0                                   | W s kg <sup>-1</sup>                 |
| enth_KdivKc                      | Ratio of temperate versus cold ice diffusivity                        | Enthalpy                     | 0.1                                        | n/a                                  |
| enth_claus_clape                 | Clausius-Clapeyron constant                                           | Enthalpy                     | 7.9 x 10 <sup>-8</sup>                     | K Pa <sup>-1</sup>                   |
| enth_melt_temp                   | Melting point at standart pressure                                    | Enthalpy                     | 273.15                                     | K                                    |
| enth_ref_temp                    | Reference temperature                                                 | Enthalpy                     | 223.15                                     | K                                    |
| enth_till_friction_angle_phi_min | Minimum till friction angle in bed-elevation dependent scheme         | Yield stress                 | 15.0                                       | °                                    |
| enth_till_friction_angle_phi_max | Maximum till friction angle in bed-elevation dependent scheme         | Yield stress                 | 50.0                                       | °                                    |
| enth_drain_rate                  | Water draining rate                                                   | Yield stress                 | 0.001                                      | mm yr <sup>-1</sup>                  |
| enth_till_wat_max                | Maximum water till tickness                                           | Yield stress                 | 2.0                                        | m                                    |
| enth_tauc_min                    | Lower caping bound for yield stress                                   | Yield stress                 | 10000.0                                    | Pa                                   |
| enth_tauc_max                    | Upper caping bound for yield stress                                   | Yield stress                 | 10000000000.0                              | Pa                                   |
| avalanche_update_freq            | Update frequency of the avalanche module                              | Avalanche                    | 5.0                                        | yr                                   |
| avalanche_angleOfRepose          | Angle of repose. For bed slopes above this, ice "avalanches"          | Avalanche                    | 45.0                                       | °                                    |
| gflex_update_freq                | Update frequency of the gFlex GIA module                              | Glacial isostatic adjustment | 50.0                                       | yr                                   |
| gflex_dx                         | Spatial grid resolution of the gFlex GIA module                       | Glacial isostatic adjustment | 2000.0                                     | m                                    |

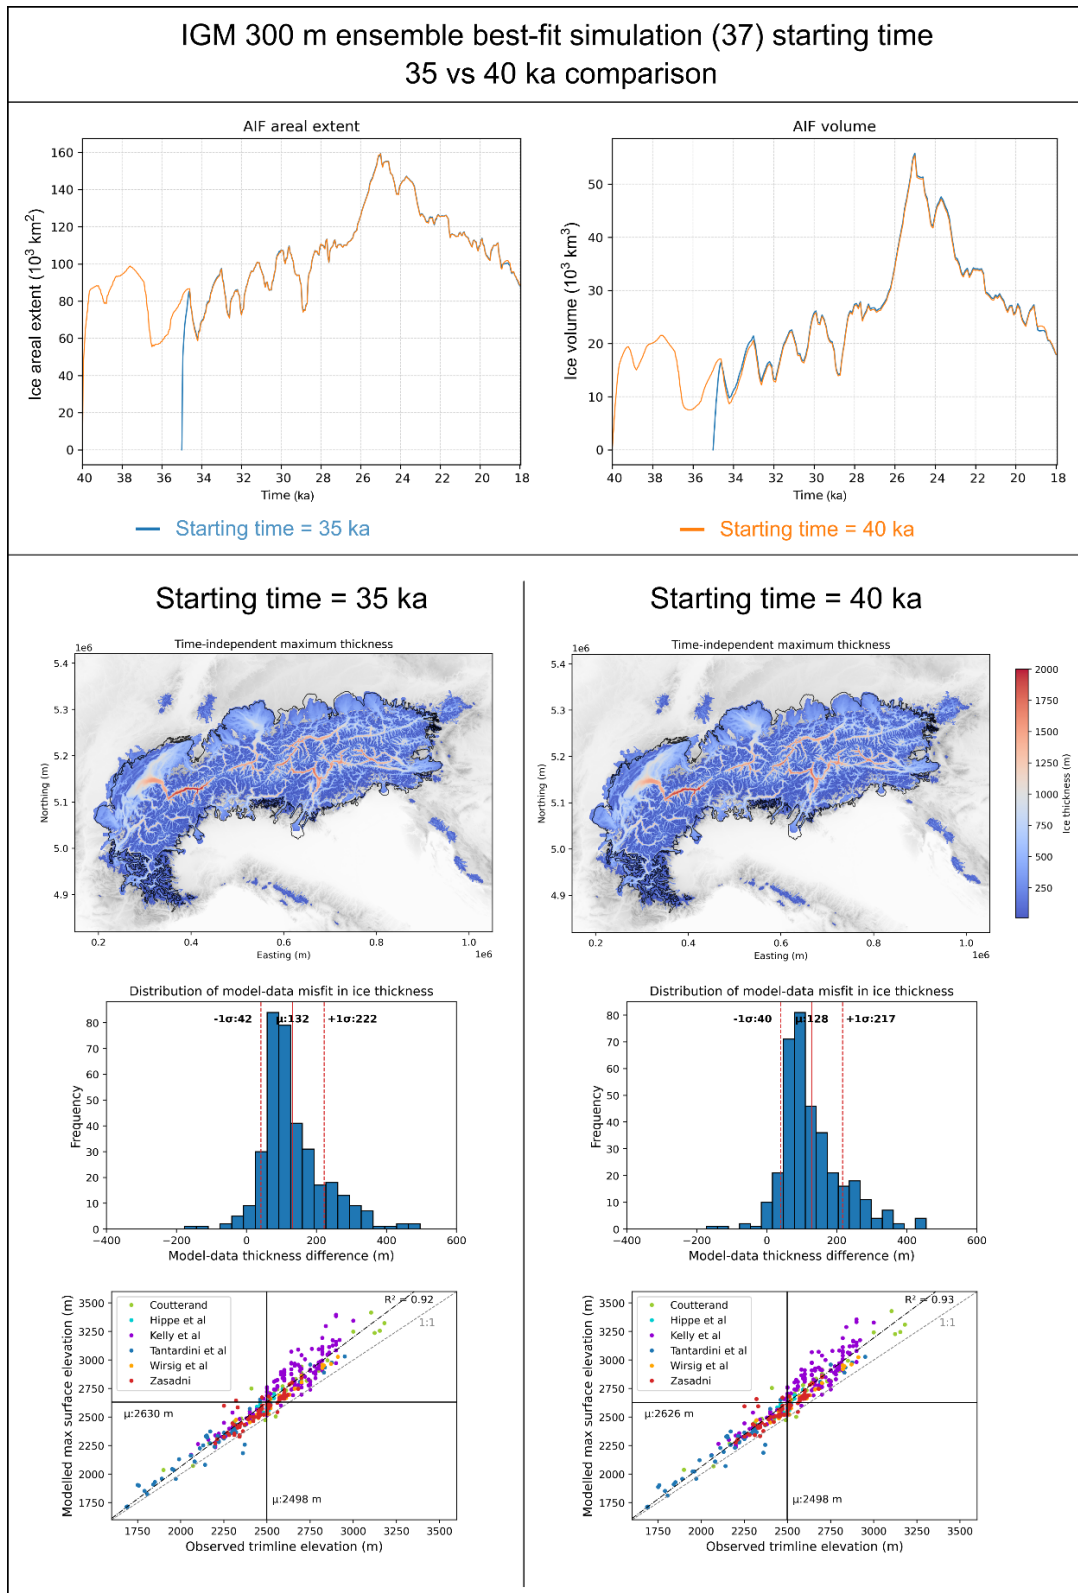

**Supplementary Figure 13:** Sensitivity of ensemble best-fit simulation (37) to starting time tested by running two simulations starting at 40 ka and 35 ka (the starting time of our ensemble simulations), respectively. This test shows the two model states converge within 4 kyr of simulation, leading to nearly identical results at the LGM. Although unrealistic, starting our simulations from an ice-free topography at 35 ka does not lead to biases in the LGM state (10 kyr later) of the AIF, due to the ice field memory and inertia not exceeding 4-6 kyr.



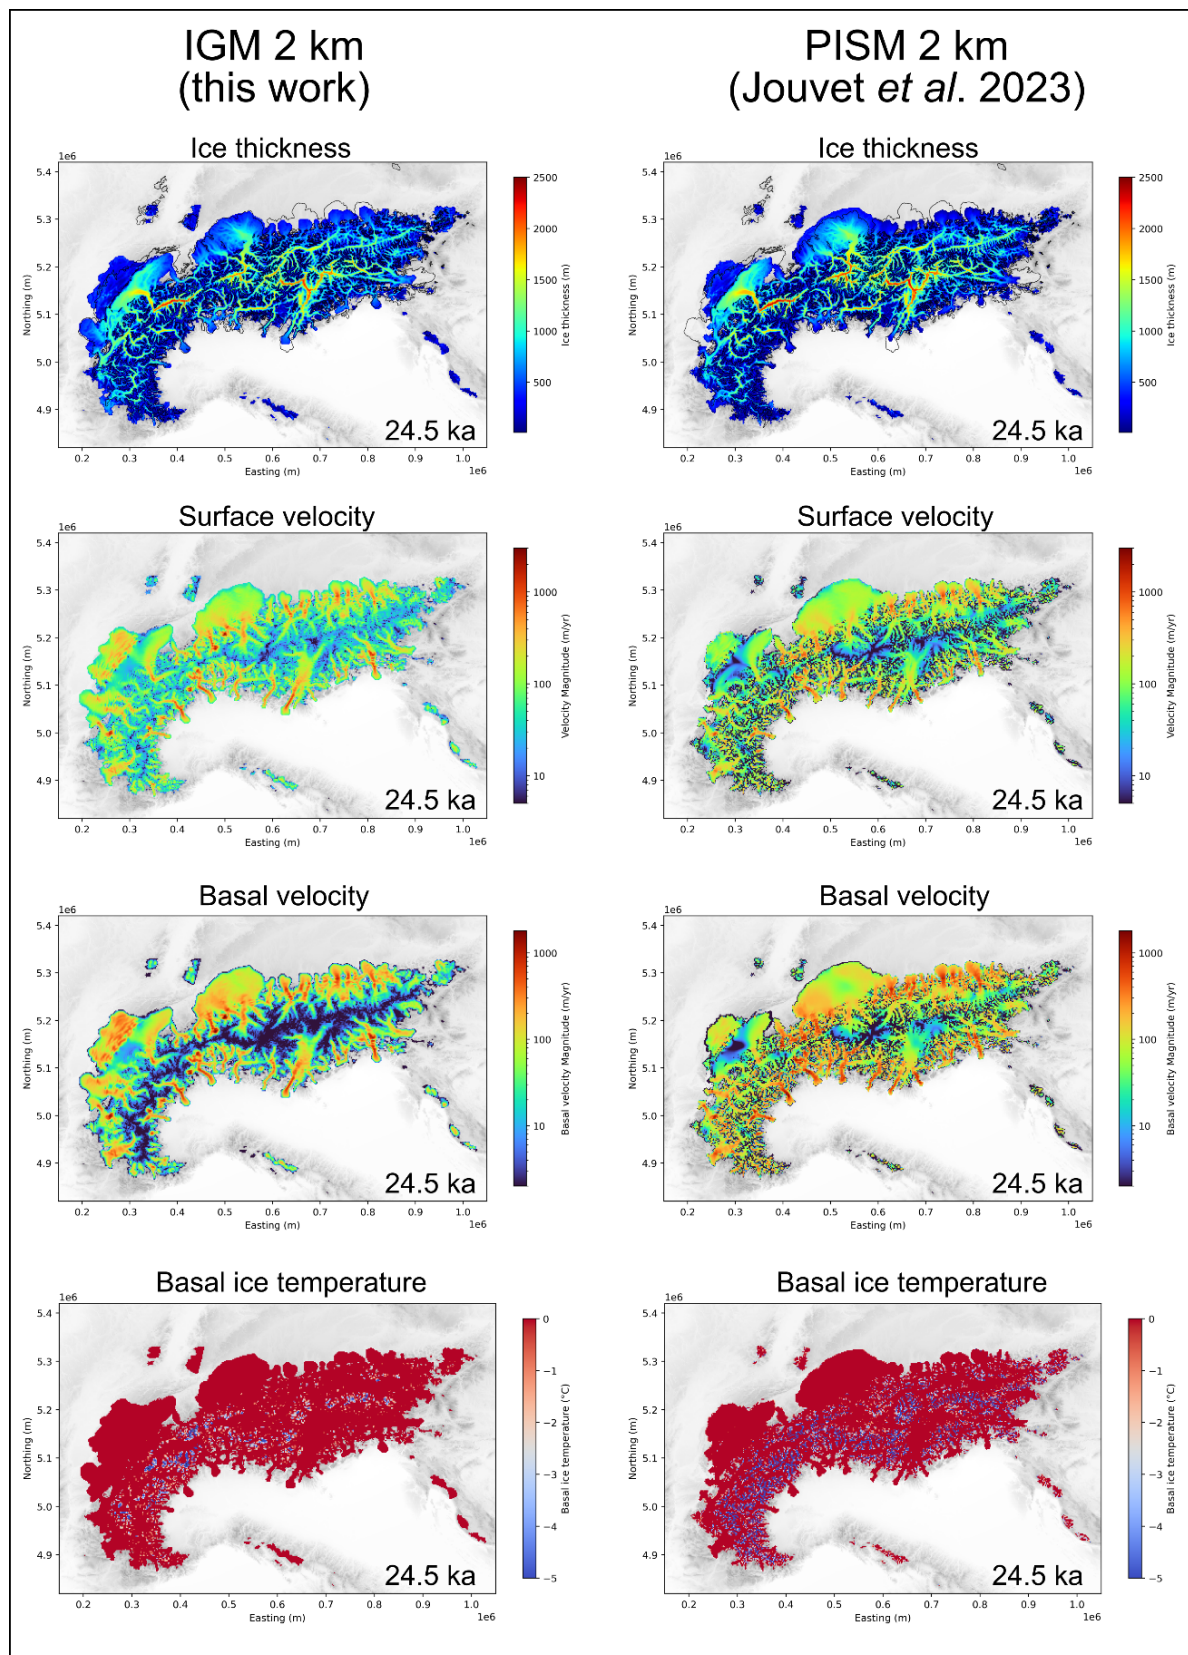

**Supplementary Figure 14:** Qualitative comparisons of spatially dependent output variables at the modelled LGM in the European Alps (24.5 ka) from an IGM 2 km simulation (see ‘Methods’ section ‘Model validation’ in main paper) and Jouvet *et al.* (2023)’ 2 km PISM simulation, using a similar model setup. This comparison exercise was conducted to validate the use of IGM for Alpine Ice Field-wide LGM simulations.

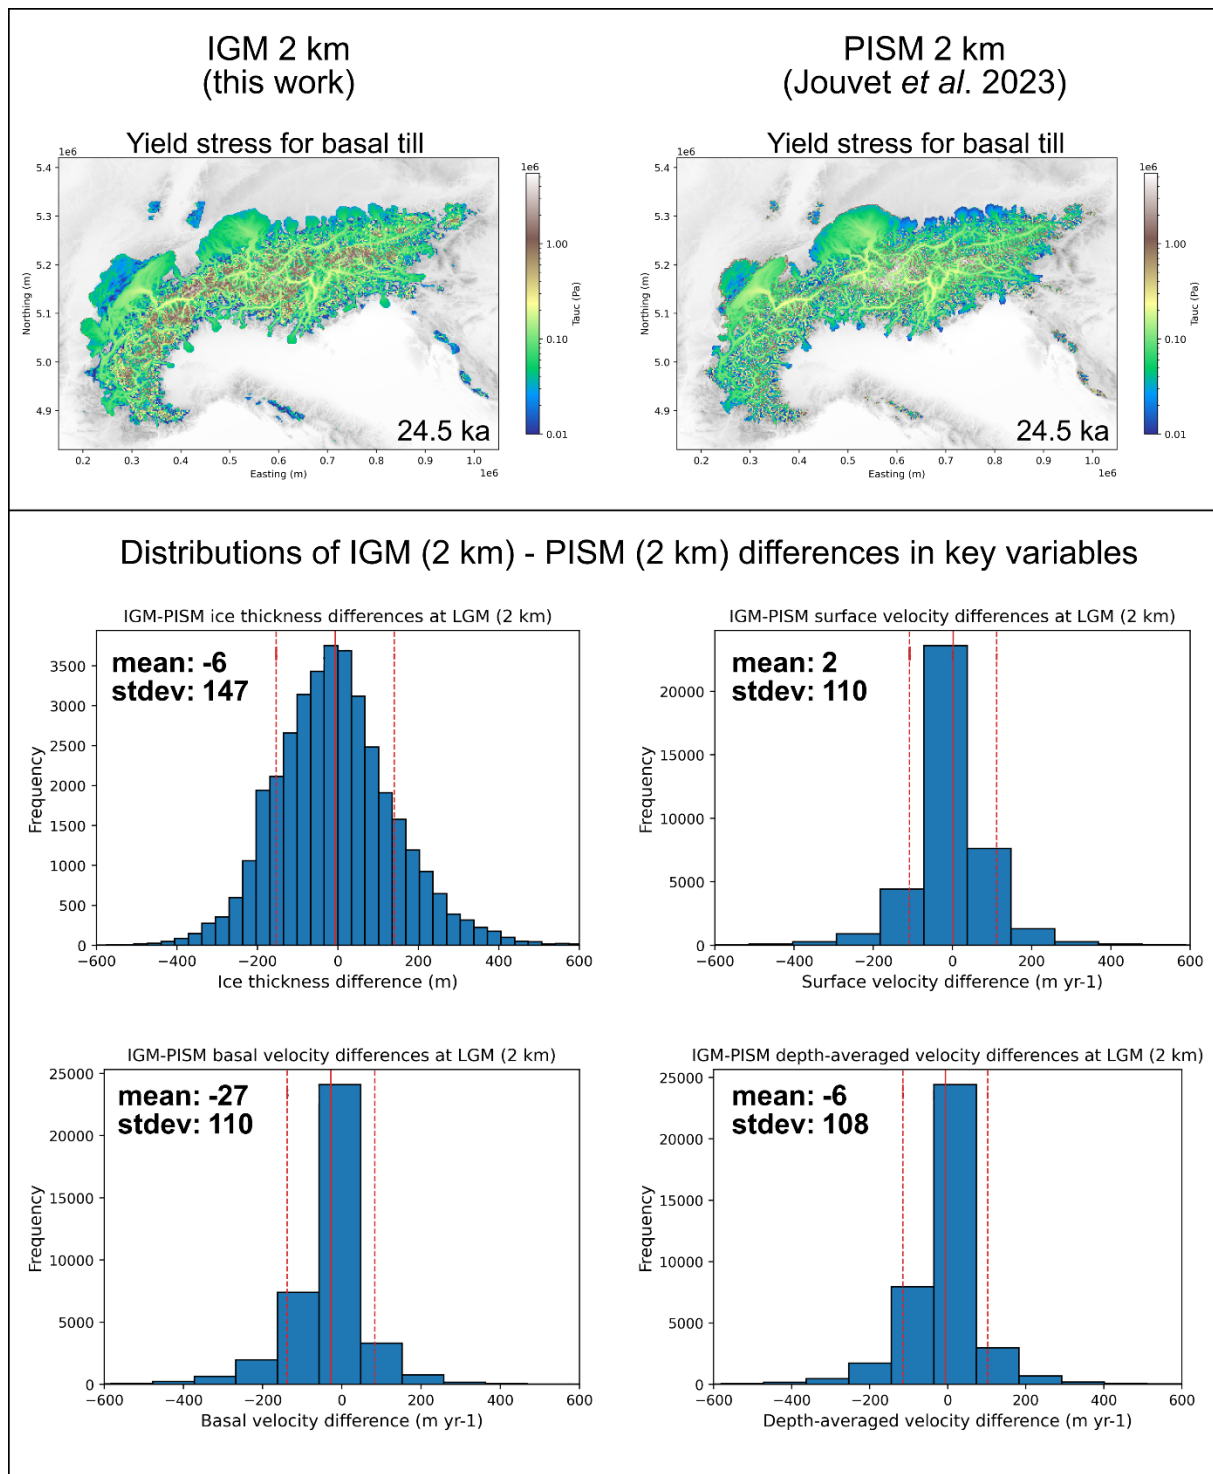

**Supplementary Figure 15:** Qualitative and quantitative comparisons of spatially dependent output variables at the modelled LGM (with EPICA glacial index forcing: 24.5 ka) between an IGM 2 km simulation (see ‘Methods’ section in main paper) and Jouvet *et al.* (2023)’ PISM 2 km simulation, using a similar model setup. This comparison exercise was conducted to validate the use of IGM for Alpine Ice Field-wide LGM simulations.

IGM and PISM (Jouvet *et al.* 2023) 2 km simulations  
AIF-wide time series comparisons

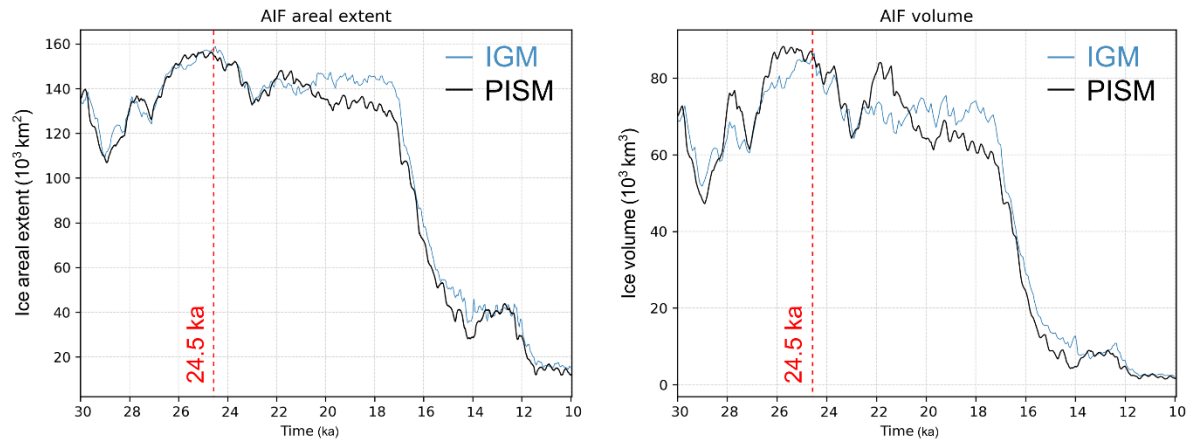

**Supplementary Figure 16:** Time series of the Alpine Ice Field areal extent and volume evolution between 30 and 10 ka for both IGM and PISM (Jouvet *et al.* 2023) simulations at 2 km, under a comparable model setup. This comparison exercise was conducted to validate the use of IGM for AIF-wide LGM simulations.

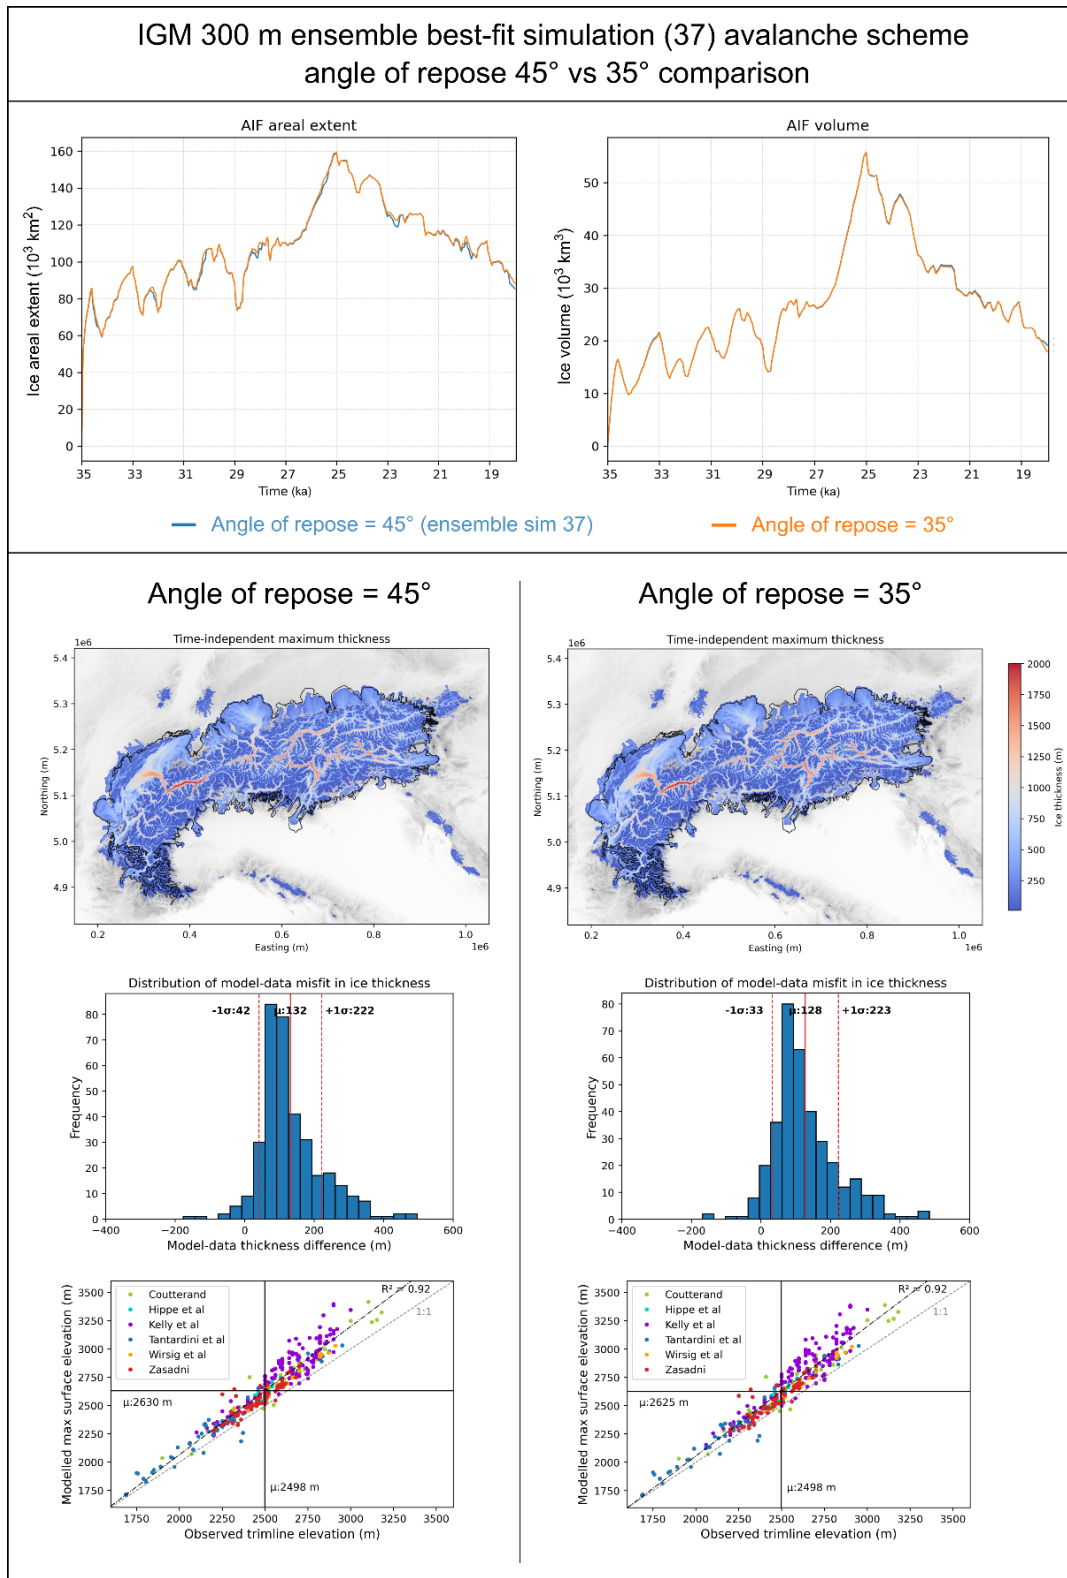

**Supplementary Figure 17:** Sensitivity of ensemble best-fit simulation (37) avalanche scheme angle of repose parameter, tested by running two simulations starting with values of 35° and 45° (the value for ensemble simulation 37), respectively. These values bracket the range of typical values for glacier angle of repose. This test shows little difference in LGM model-data fit between the two simulations, highlighting a lack of model sensitivity to the angle of repose parameter value, when analysing Alps-wide LGM thickness and extent fit.



**Supplementary Table 3:** List and descriptions of high-resolution Digital Elevation Models used for independent verification of reported trimline elevations.

**Supplementary Table 3. Digital elevation models used for independent verification of trimline elevations**

| DEM name                                     | Region covered                     | Releasing organisation                                                                                           | Year released | Spatial resolution (m) | Vertical error (m) | URL                                                                                                                                                                                                                                                                                                                                                                                                                                                                                                                                                                                                                                             |
|----------------------------------------------|------------------------------------|------------------------------------------------------------------------------------------------------------------|---------------|------------------------|--------------------|-------------------------------------------------------------------------------------------------------------------------------------------------------------------------------------------------------------------------------------------------------------------------------------------------------------------------------------------------------------------------------------------------------------------------------------------------------------------------------------------------------------------------------------------------------------------------------------------------------------------------------------------------|
| RGE ALTI® Version 2.0 product                | French Alps                        | Institut national de l'information géographique et forestière                                                    | 2024          | 1.0                    | 0.2 - 10.0         | <a href="https://geoservices.ign.fr/documentation/donnees/alti/rgealti">https://geoservices.ign.fr/documentation/donnees/alti/rgealti</a>                                                                                                                                                                                                                                                                                                                                                                                                                                                                                                       |
| swissALTI3D                                  | Swiss Alps                         | Federal Office of Topography swisstopo                                                                           | 2024          | 0.5                    | 0.3 - 1.0          | <a href="https://www.swisstopo.admin.ch/en/height-model-swissalti3d">https://www.swisstopo.admin.ch/en/height-model-swissalti3d</a>                                                                                                                                                                                                                                                                                                                                                                                                                                                                                                             |
| DigitalTerrainModel-0.5m                     | Italian Alps, south Tyrol region   | Autonome Provinz Bozen - Abteilung Natur, Landschaft und Raumentwicklung - Amt für Landesplanung und Kartografie | 2021          | 0.5                    | 0.2 - 10.0         | <a href="https://data.civis.bz.it/de/dataset/modello-digitale-del-terreno-dtm-05m">https://data.civis.bz.it/de/dataset/modello-digitale-del-terreno-dtm-05m</a>                                                                                                                                                                                                                                                                                                                                                                                                                                                                                 |
| DTM 5X5 - Modello digitale del terreno       | Italian Alps, Lombardy region      | Regione Lombardia                                                                                                | 2015          | 5.0                    | 0.3 - 2.0          | <a href="https://www.geoportale.regione.lombardia.it/metadata/2o_p_id=detailSheet/Metadata_WAR_opt/metadata/aportlet8o_p_id=cycle=0&amp;o_n_state=normal&amp;o_n_mode=view&amp;detailSheet/Metadata_WAR_opt/metadata/aportlet_id=detailSheet_lombardia%3A4dfc98d60-5f02-4a2b-8113-5ad24cc53a9c&amp;_jsBridgeRedirect=true">https://www.geoportale.regione.lombardia.it/metadata/2o_p_id=detailSheet/Metadata_WAR_opt/metadata/aportlet8o_p_id=cycle=0&amp;o_n_state=normal&amp;o_n_mode=view&amp;detailSheet/Metadata_WAR_opt/metadata/aportlet_id=detailSheet_lombardia%3A4dfc98d60-5f02-4a2b-8113-5ad24cc53a9c&amp;_jsBridgeRedirect=true</a> |
| RIPRESA AEREA ICE 2009-2011 - DTM 5          | Italian Alps, Piemonte region      | Regione Piemonte                                                                                                 | 2019          | 5.0                    | 0.3                | <a href="https://www.geoportale.piemonte.it/geonet/work/svlla/catalogo/search#metadata/c_piemonon/224de2ac-023e-441c-9ae0-ga493b217a8a">https://www.geoportale.piemonte.it/geonet/work/svlla/catalogo/search#metadata/c_piemonon/224de2ac-023e-441c-9ae0-ga493b217a8a</a>                                                                                                                                                                                                                                                                                                                                                                       |
| Modello Digitale del Terreno (DTM 2005/2008) | Italian Alps, Valle d'Aosta region | Regione Autonoma Valle d'Aosta                                                                                   | 2008          | 2.0                    | 0.2 - 10.0         | <a href="https://geoportale.regione.vda.it/download/dtm/">https://geoportale.regione.vda.it/download/dtm/</a>                                                                                                                                                                                                                                                                                                                                                                                                                                                                                                                                   |
| Digitales Geländemodell Tirol product        | Austrian Alps, Tyrol region        | Land Tirol                                                                                                       | 2023          | 0.5-1.0                | 0.2 - 10.0         | <a href="https://www.data.gv.at/catalog/dataset/land-tirol_tirolgelinde/resource/3eb16718-a4fe-45e3-a92c-3d057237ae00#additional-info">https://www.data.gv.at/catalog/dataset/land-tirol_tirolgelinde/resource/3eb16718-a4fe-45e3-a92c-3d057237ae00#additional-info</a>                                                                                                                                                                                                                                                                                                                                                                         |

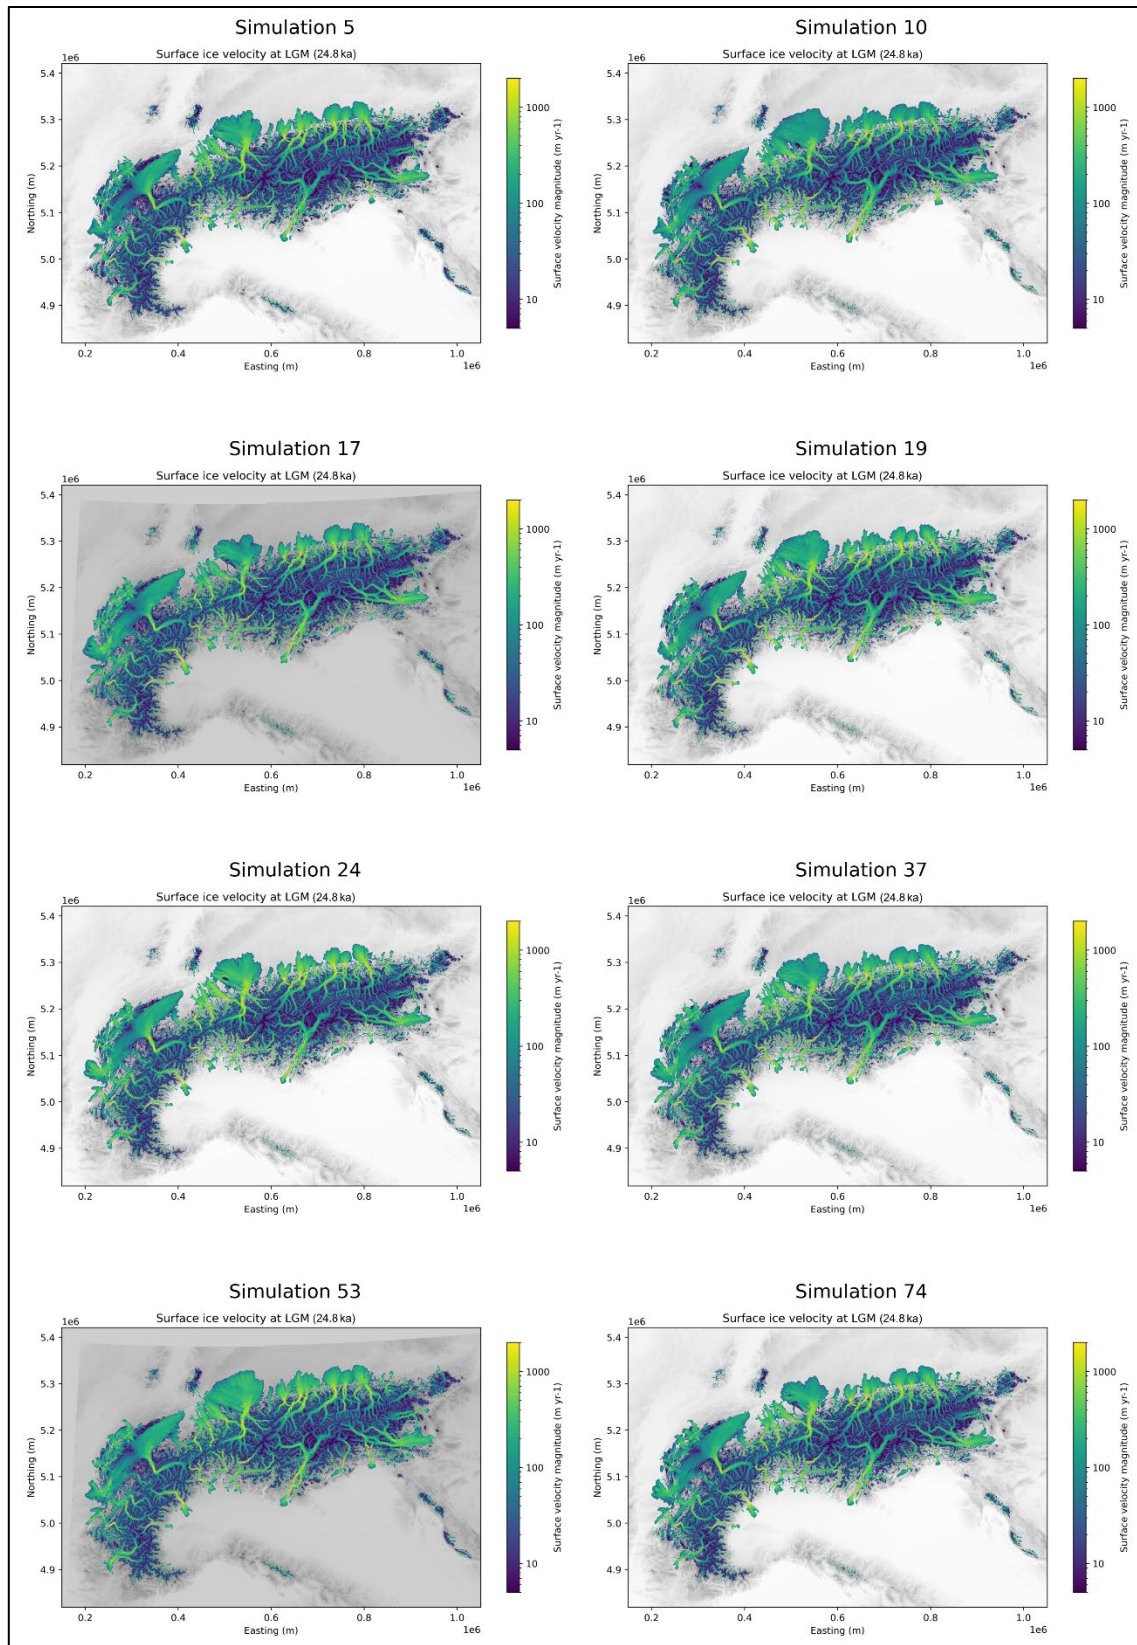

**Supplementary Figure 18:** LGM ice surface velocity (24.8 ka) for the eight NROY ensemble-member simulations that remain after applying three model-data comparison sieves.

IGM best-fit 300 m simulation (number 37): ice flow direction and velocity

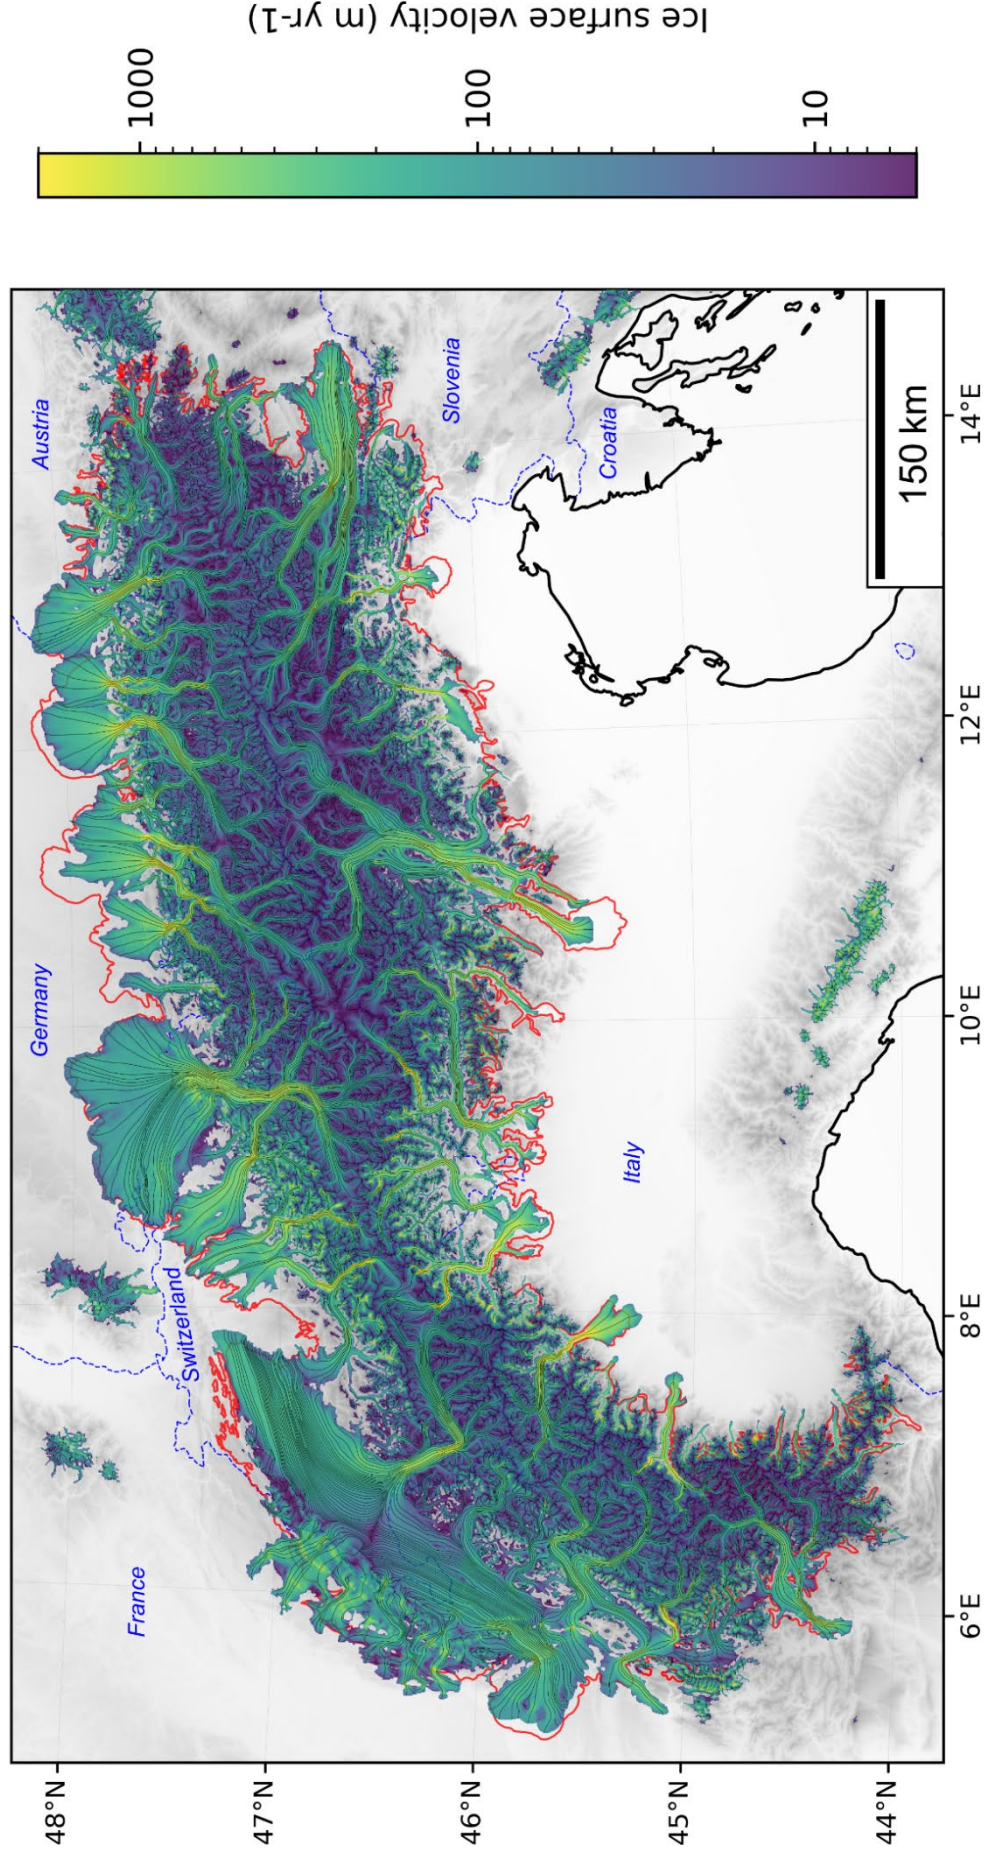

**Supplementary Figure 19:** Best-fit IGM 300 m simulation (number 37) results displayed by presenting its surface velocity field at the modelled LGM (24.8 ka) with superimposed static depth-averaged flow lines indicating both flow speed (line density) and trajectory (line direction). The empirical LGM outline of the AIF used in this study is shown in red, while country borders and coastlines are shown with dashed blue and thick black lines, respectively.



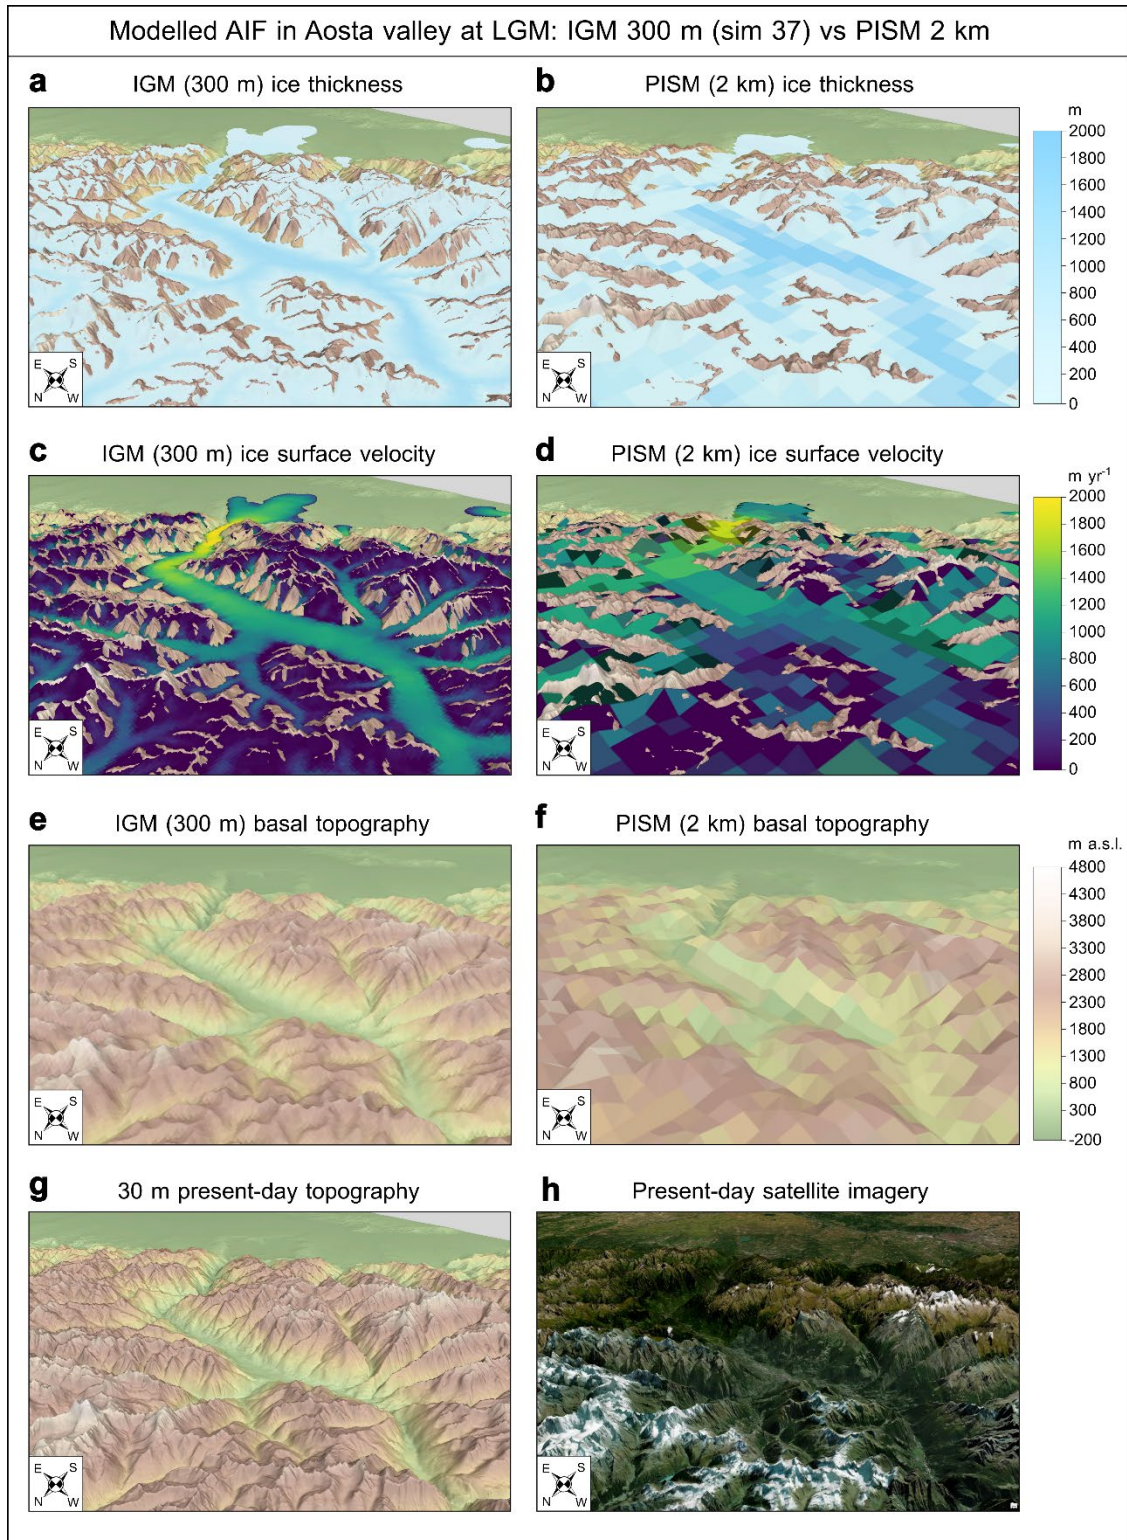

**Supplementary Figure 20:** Three-dimensional view of best-fit IGM 300 m simulation (number 37) compared with Jouvét *et al.* (2023)’s 2 km simulation displayed by showing modelled LGM ice thickness (panels **a**, **b**), ice surface velocity (panels **c**, **d**), and basal topography (panels **e**, **f**) fields in the main Aosta valley (looking towards the Southeast Alpine foreland). Ice thickness and velocity fields are plotted above a 30 m digital elevation model of the local topography (AW3D30 data), also shown in panel **g**. Panel **h** plots a satellite imagery of the same region (data from the Esri World imagery layer, source: Esri, Maxar, Earthstar Geographics, and the GIS User Community).



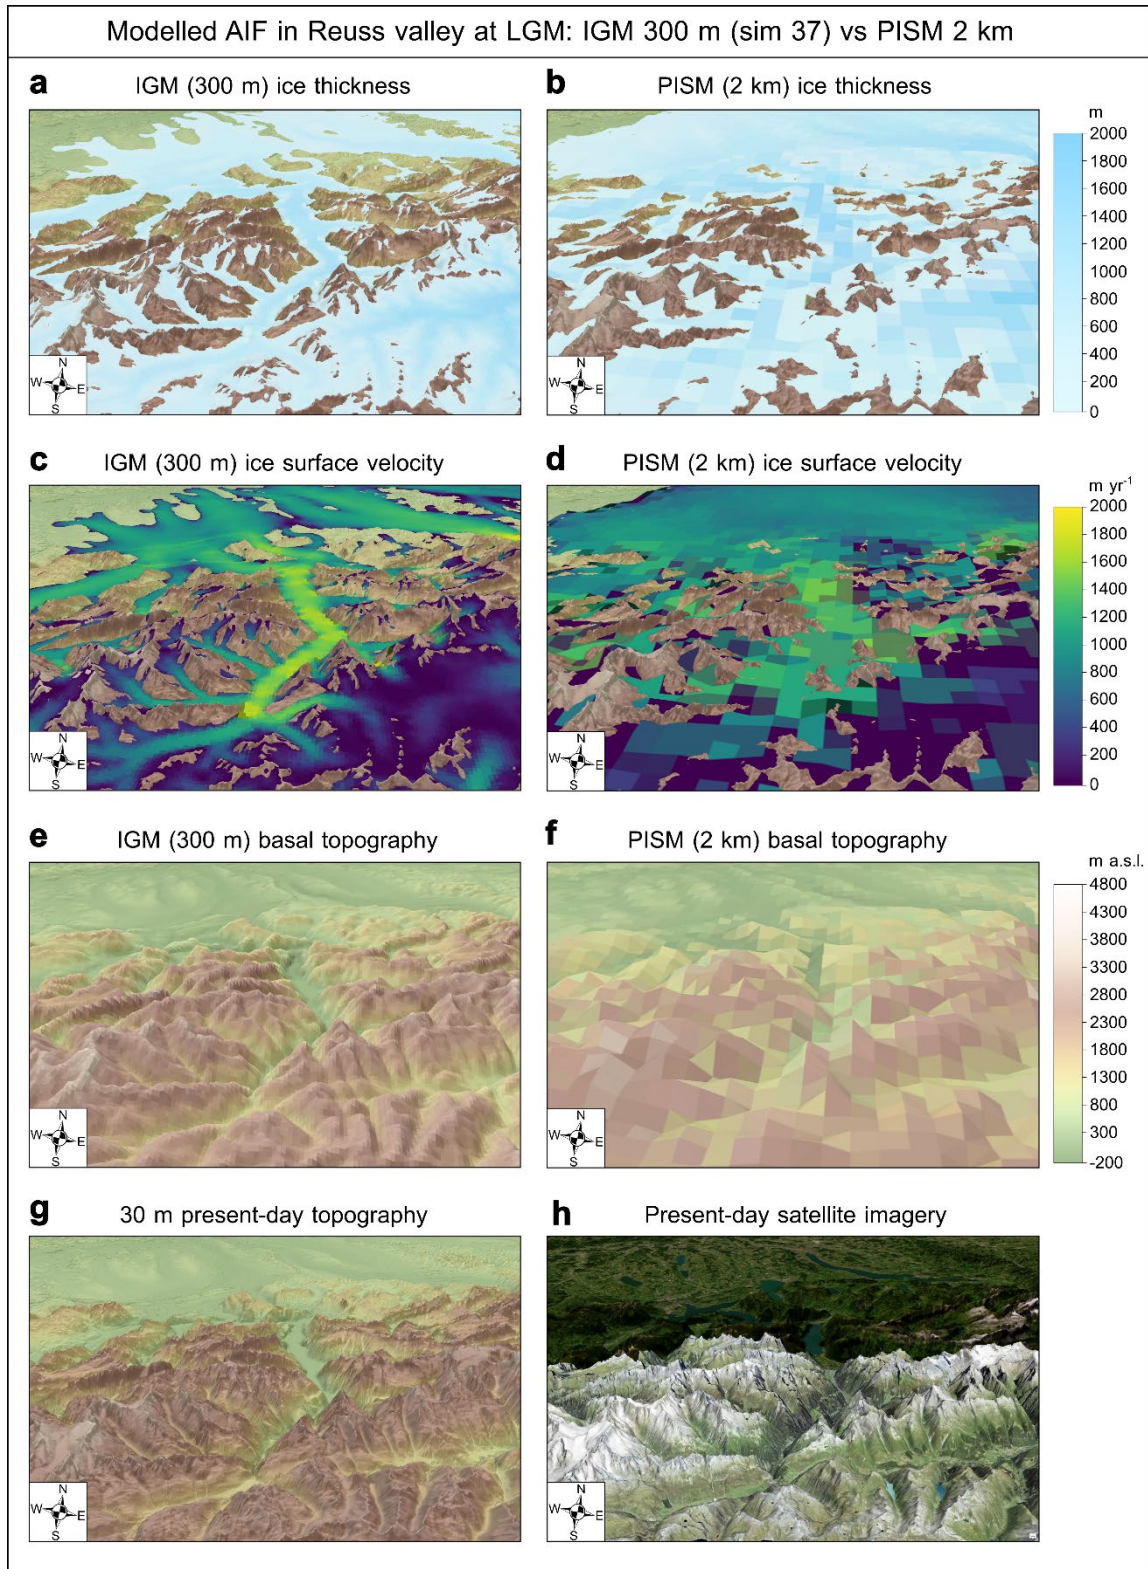

**Supplementary Figure 21:** Three-dimensional view of best-fit IGM 300 m simulation (number 37) compared with Jouvét *et al.* (2023)'s 2 km simulation displayed by showing modelled LGM ice thickness (panels **a**, **b**), ice surface velocity (panels **c**, **d**), and basal topography (panels **e**, **f**) fields in the main Reuss valley (looking North towards Alpine foreland). Ice thickness and velocity fields are plotted above a 30 m digital elevation model of the local topography (AW3D30 data), also shown in panel **g**. Panel **h** plots a satellite imagery of the same region (data from the Esri World imagery layer, source: Esri, Maxar, Earthstar Geographics, and the GIS User Community).
